# Supplementary material for: The Phosphoglycerate Kinase (PGK) Gene Family of Maize (Zea mays var. B73)
Source: MDPI journal article supplement (doi:10.3390/plants9121639), 2020-11-24

**Figure S7** Comparison (A) and sequence analysis (B) of nuclear PGKs from plants with an additional methyltransferase domain.

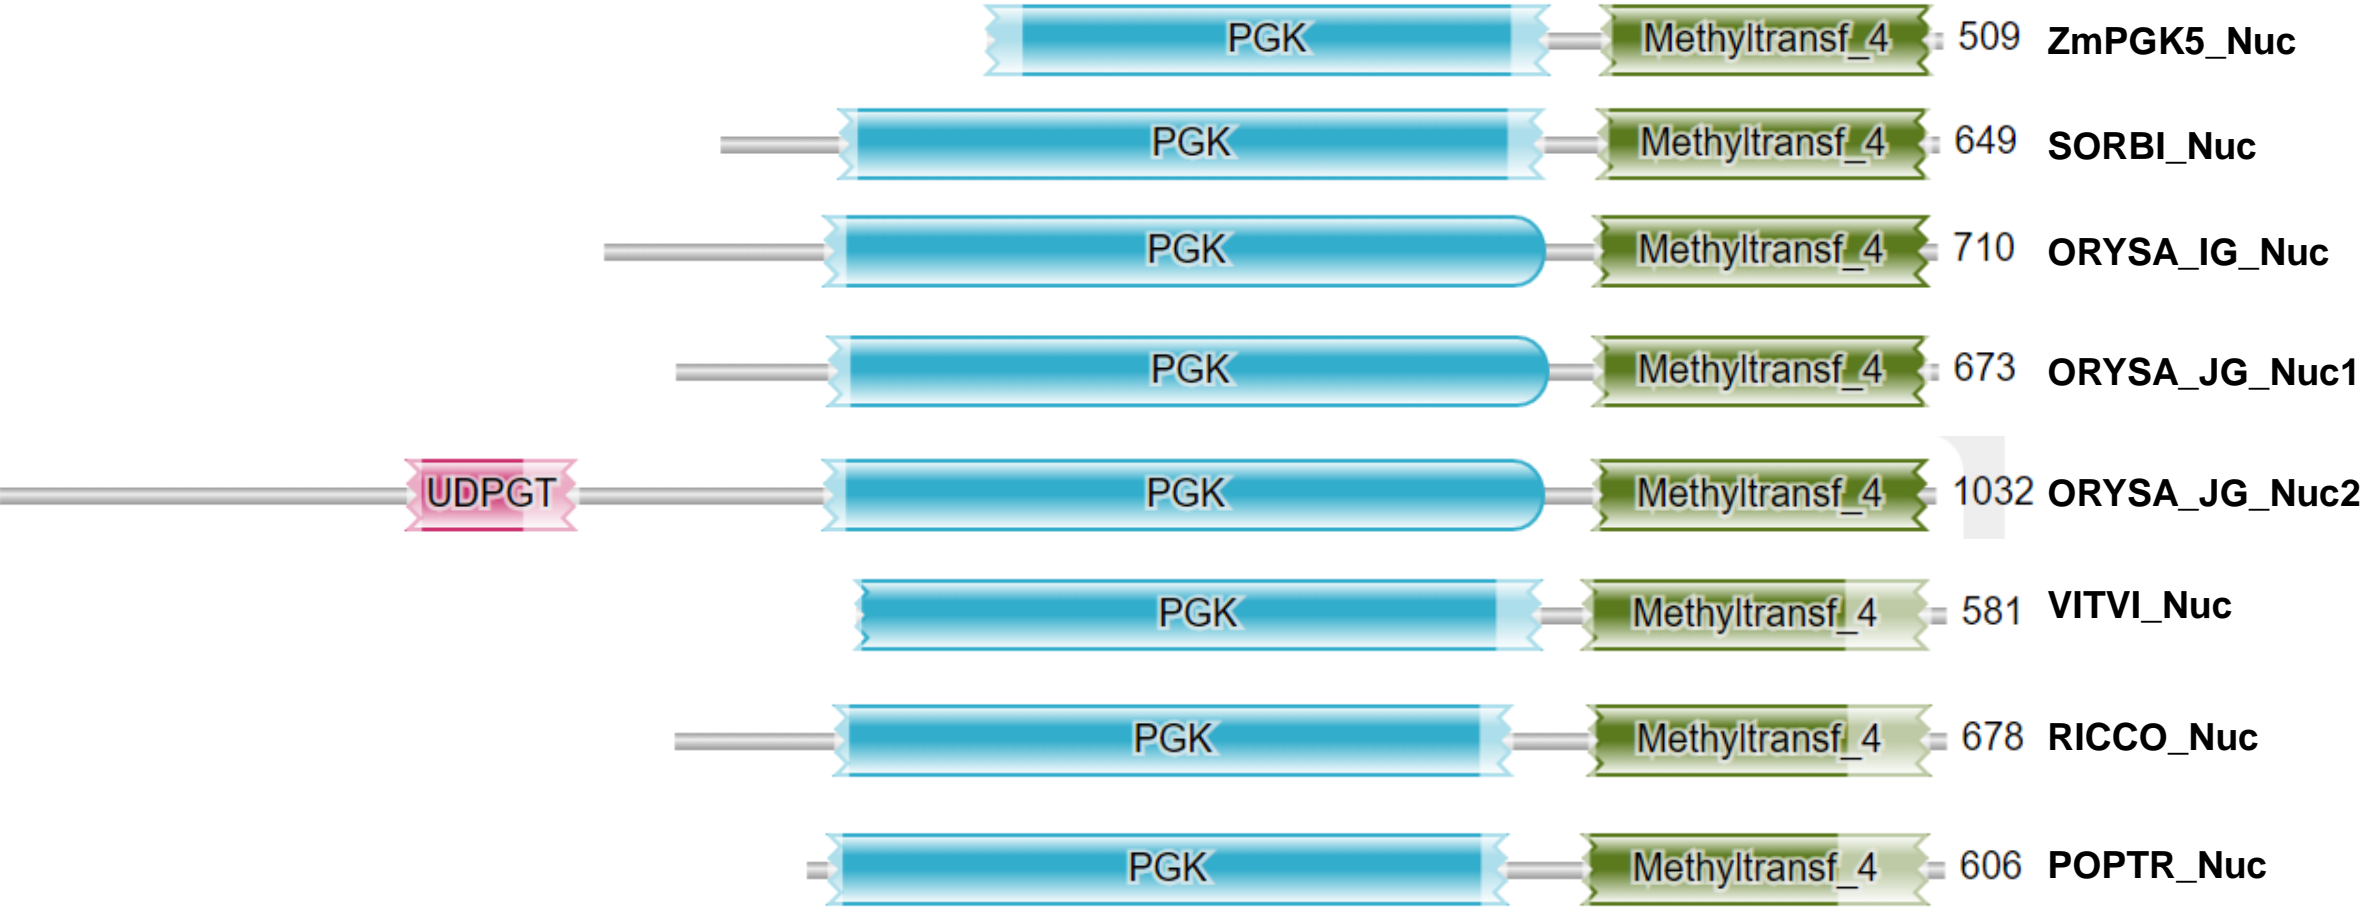

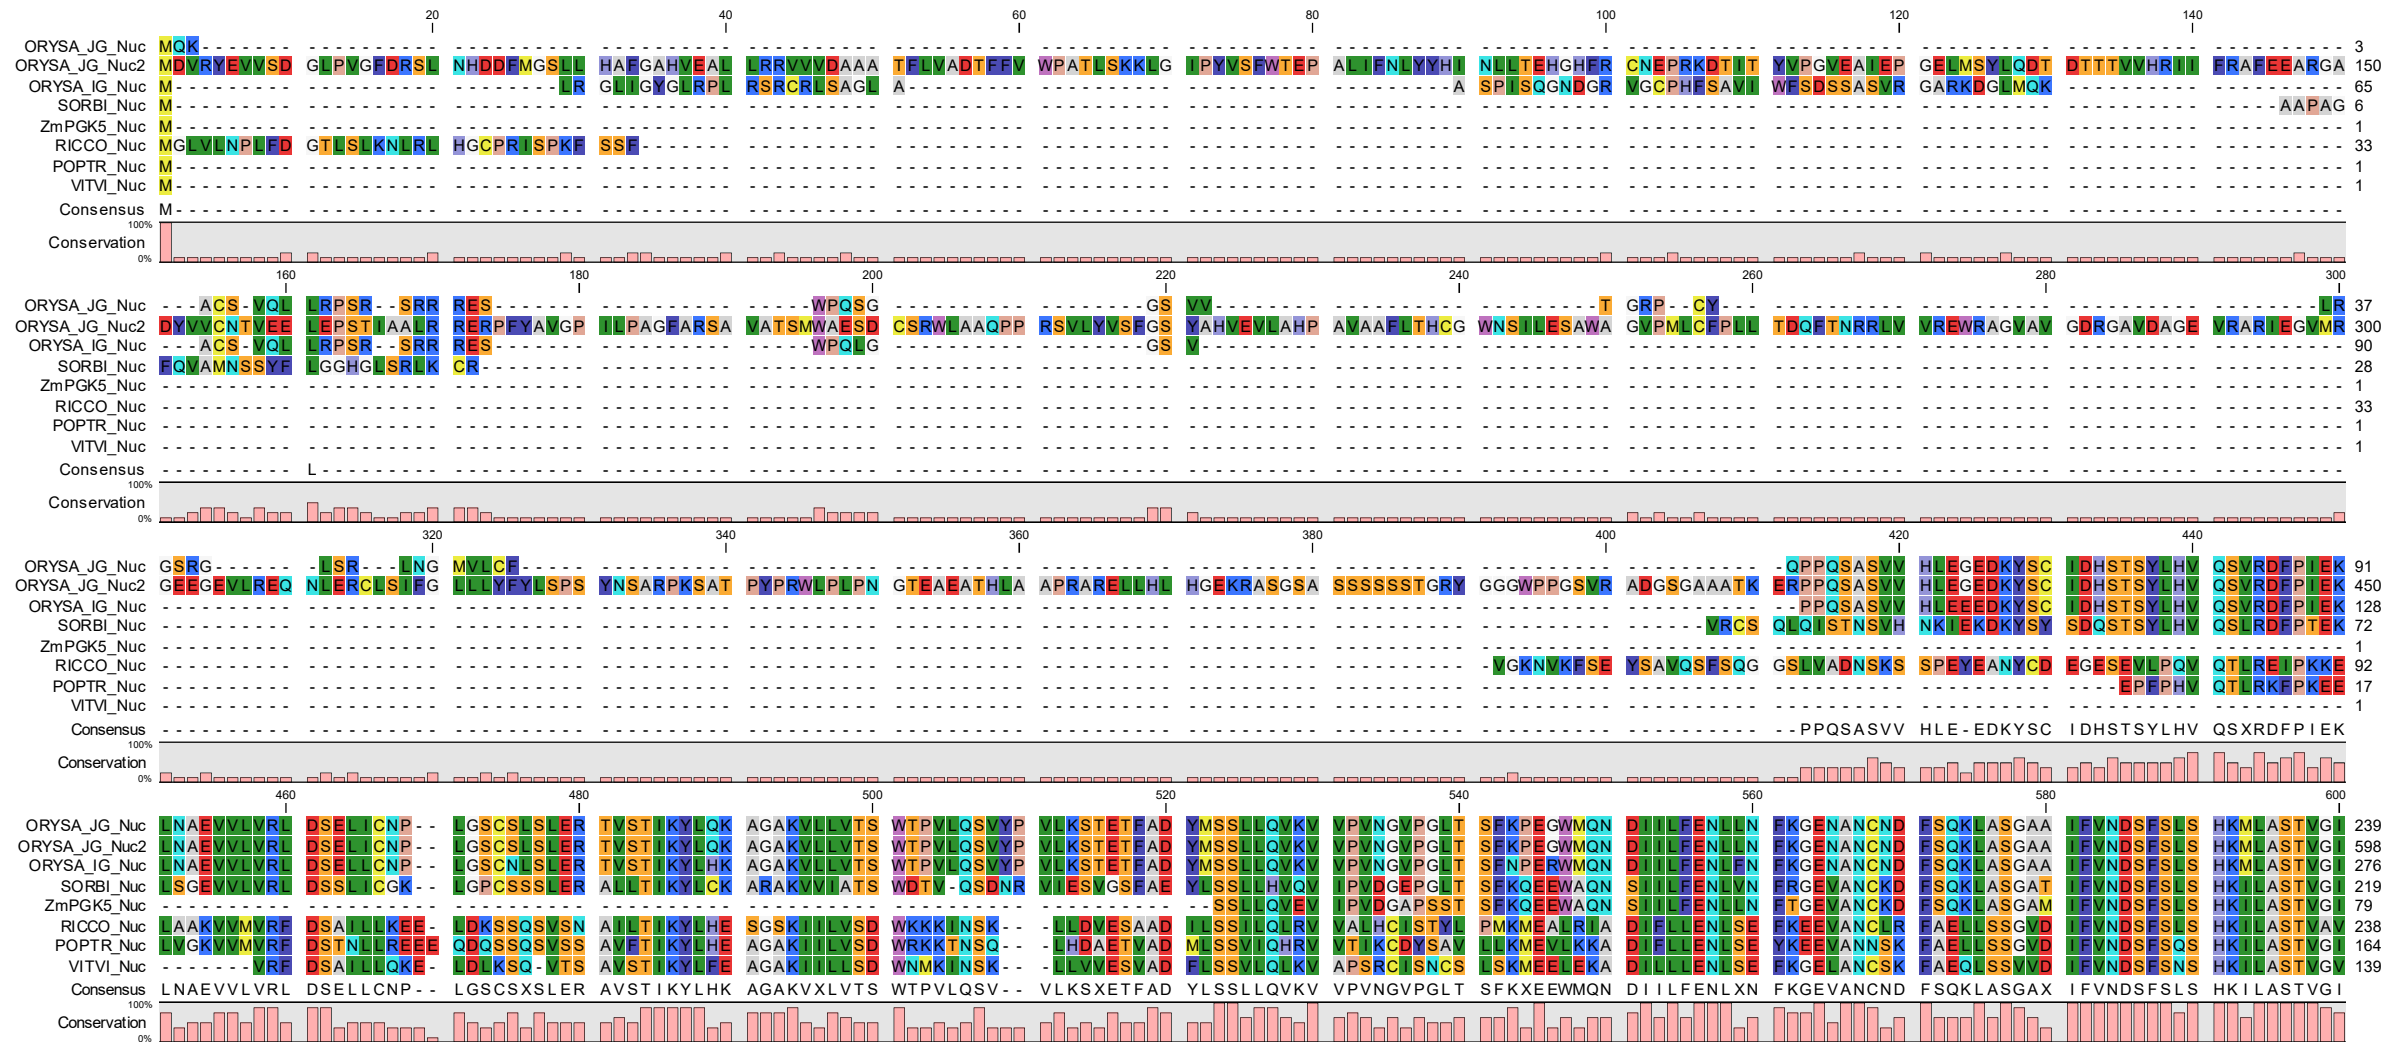

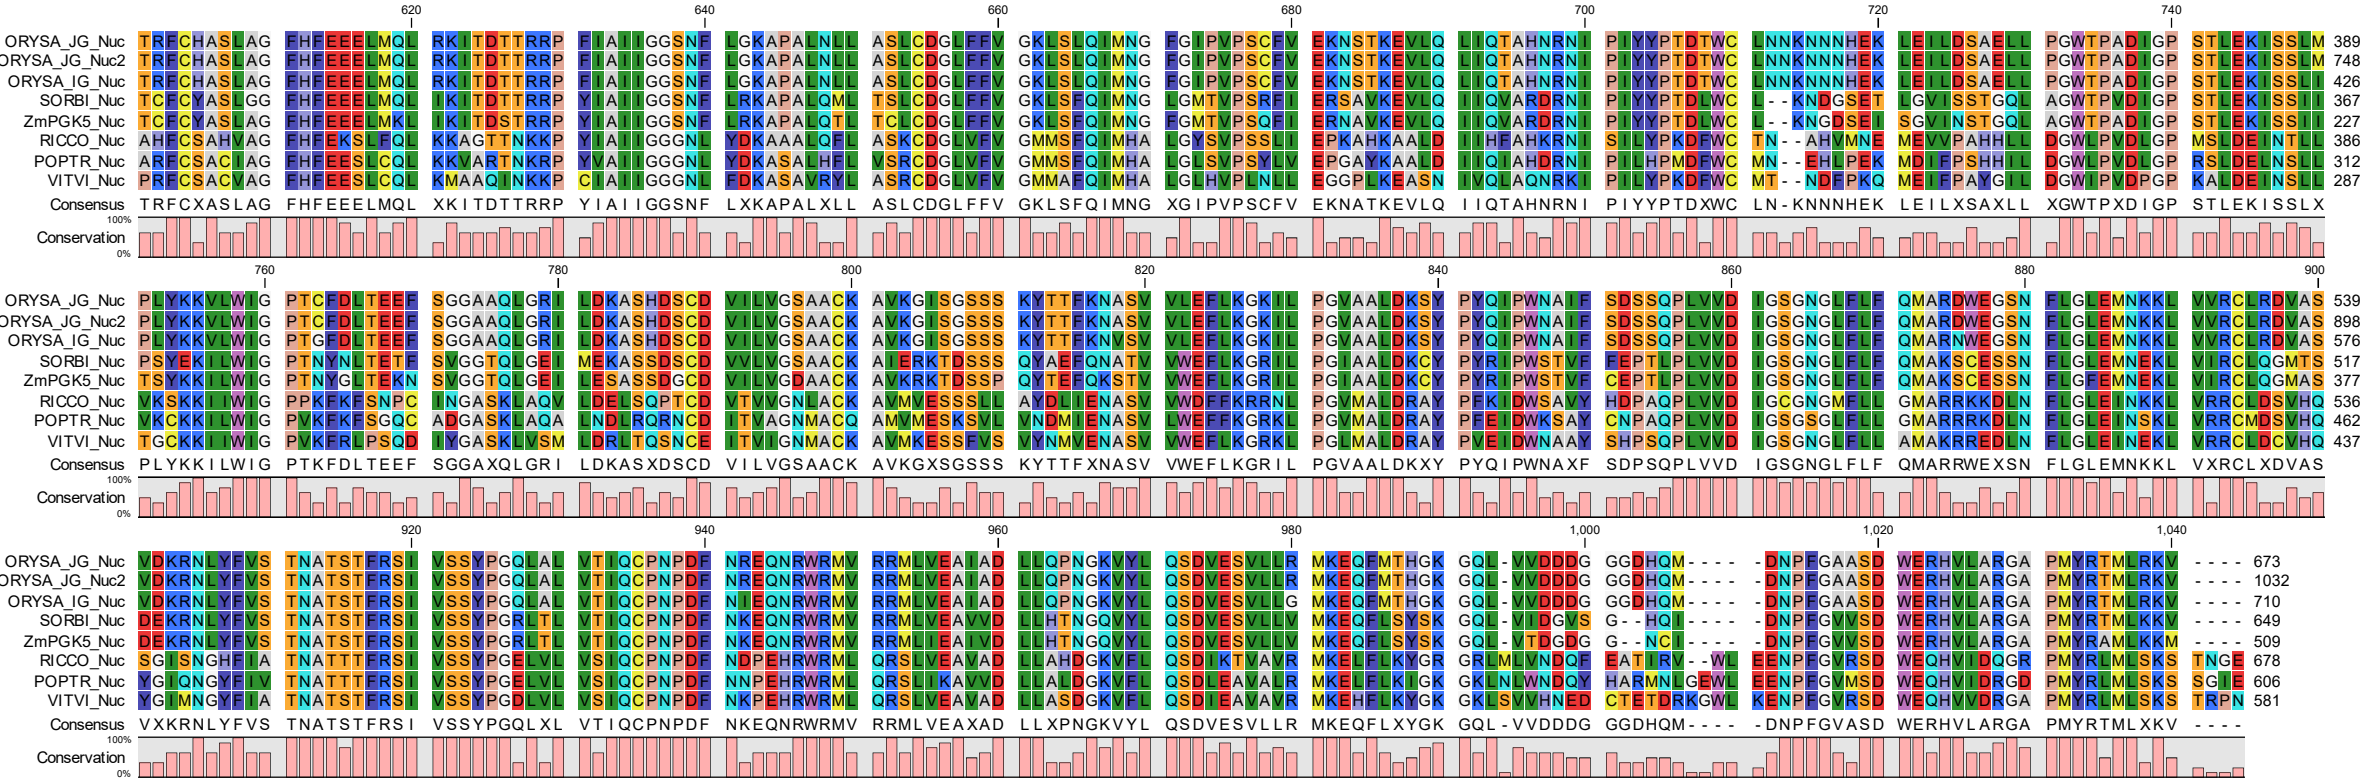

Supplement: s1 [file s1]
