# Supplementary material for: The Phosphoglycerate Kinase (PGK) Gene Family of Maize (Zea mays var. B73)
Source: MDPI journal article supplement (doi:10.3390/plants9121639), 2020-11-24
Supplement: s1 [file s1]

**Figure S1** Global alignment of all PGK proteins from publicly available plant and animal databases. Alignment parameters were gap cost = 40, gap extension = 10, and gap end as any other. The different colors, according to RasMol color coding, highlight the chemical properties of residues: red = negatively charged, dark blue = positively charged, light blue = neutral, green = hydrophobic (green), yellow = sulphur-containing, etc). The sequence conservation = a percentage bar-score (bottom). The sequence logo summarises the occurrence of given amino acids at specific positions (very bottom)

|               |             |            | 20         |              |             | 40         |             |                | 60             |               |            | 80 |    |
|---------------|-------------|------------|------------|--------------|-------------|------------|-------------|----------------|----------------|---------------|------------|----|----|
| POPNI_Cyt     | MA          |            | T          |              |             |            |             |                |                |               |            |    | 3  |
| POPTR_Cyt2    | MA          |            | T          |              |             |            |             |                |                |               |            |    | 3  |
| POPTR_Cyt1    | MA          |            | T          |              |             |            |             |                |                |               |            |    | 3  |
| RICCO_Cyt     | MA          |            | T          |              |             |            |             |                |                |               |            |    | 3  |
| GOSHI_Cyt     | MA          |            | T          |              |             |            |             |                |                |               |            |    | 3  |
| VITVI_Cyt     | MA          |            | T          |              |             |            |             |                |                |               |            |    | 3  |
| SOLTU_Cyt     | MA          |            | V          |              |             |            |             |                |                |               |            |    | 3  |
| NICTA_Cyt     | MA          |            | V          |              |             |            |             |                |                |               |            |    | 3  |
| HELAN_Cyt     | MA          |            | T          |              |             |            |             |                |                |               |            |    | 3  |
| ARATH_Cyt     | MA          |            | T          |              |             |            |             |                |                |               |            |    | 3  |
| PISSA_Cyt     | MA          |            | T          |              |             |            |             |                |                |               |            |    | 3  |
| SORBI_Cyt1    | MA          |            | T          |              |             |            |             |                |                |               |            |    | 3  |
| ZmPGK3_Cyt    | MA          |            | T          |              |             |            |             |                |                |               |            |    | 3  |
| ORYSA_IG_Cyt  | MA          |            | T          |              |             |            |             |                |                |               |            |    | 3  |
| ORYSA_IG_Cyt  | MA          |            | T          |              |             |            |             |                |                |               |            |    | 3  |
| SORBI_Cyt2    | MA          |            | T          |              |             |            |             |                |                |               |            |    | 3  |
| ORYSA_IG_Cyt2 | MA          |            | S          |              |             |            |             |                |                |               |            |    | 3  |
| TRIAE_Cyt     | MA          |            | T          |              |             |            |             |                |                |               |            |    | 3  |
| POPNI_Chl     | MA          |            | SAT        |              |             |            | A - P       | TTLSLLKTA      | -AASTSTTS - A  | RASLLPVSTG    |            |    | 34 |
| POPTR_Chl2    | MA          |            | SAT        |              |             |            | A - P       | TTLSLLKTA      | -AASTSTTS - A  | RASLLPVSTG    |            |    | 34 |
| POPTR_Chl1    | MA          |            | SAT        |              |             |            | A - P       | TTLSLLKTA      | -ASSTSTTS - V  | RASLLPVSTG    |            |    | 34 |
| RICCO_Chl     | MA          |            | SAT        |              |             |            | A - P       | TTLSLLKTT      | -ASSSTSTTRA    | RASLLPVSTG    |            |    | 33 |
| NICTA_Chl     | MA          |            | SAT        |              |             |            | A - S       | HTLCGLPAT      | -SSS - ITTNK   | --AIPSSAR     |            |    | 31 |
| NICBE_Chl     | MA          |            | SAT        |              |             |            | A - S       | HSLCGIPAT      | -SSS - ITTNK   | --STIAPSSAR   |            |    | 31 |
| SOLTU_Chl     | MA          |            | SAT        |              |             |            | A - S       | HTFCGPTT       | -SSSSTTNR      | -STTHSSAR     |            |    | 32 |
| MUSAC_Chl     | MA          |            | S T        |              |             |            | A - A       | TSFSLPTS       | -SS - - - - RR | RVAAVVVAPSR   |            |    | 29 |
| VITVI_Chl1    | MA          |            | SAA        |              |             |            | ASP         | SSLSLHST       | -SAARSSPR      | - - - - LPSAS |            |    | 31 |
| VITVI_Chl2    | MA          |            | SAA        |              |             |            | ASP         | SSLSLHST       | -SAARSSPR      | - - - - LPSAS |            |    | 31 |
| ARATH_Chl2    | MA          |            | SAA        |              |             |            | A - S       | SAFSLKSTG      | AVASSAGTRA     | RASLLPIPST    |            |    | 37 |
| ARATH_Chl1    | MA          |            | STA        |              |             |            | A - T       | AALSLLKSTG     | GAAVTRSSRA     | - - SGHPST    |            |    | 35 |
| SORBI_Chl     | MA          |            | SAA        |              |             |            | AAP         | TLSL - - - AA  | RAATRAATAA     | AAAAAPLRRG    |            |    | 35 |
| ZmPGK1_Chl    | MA          |            | SAA        |              |             |            | APP         | TLSL - - - AA  | RAATRAA - -    | AAAAAPLRRG    |            |    | 32 |
| ZmPGK2_Chl    | MA          |            | SAA        |              |             |            | APP         | TLSL - - - AA  | RAASRAA - -    | - - - AAPLRRG |            |    | 29 |
| TRIAE_Chl     | MA          |            | STA        |              |             |            | APP         | AAL - V - - AR | RAAS - - -     | ASMAAPLRGA    |            |    | 28 |
| SPIOL_Chl     | GA          |            | S          |              |             |            |             |                |                |               |            |    | 3  |
| MUSAC_Cyt     | MA          |            | T          |              |             |            |             |                |                |               |            |    | 3  |
| ORYSA_IG_Chl  | M           |            |            |              |             |            |             | ASV            | AATTFPSMT      | PAARGIVAGA    | AASTVPLPRA |    | 34 |
| ORYSA_IG_Chl2 | M           |            | RCSQSQ     | TL - SLSPKKS | SLSLPALHD   | CTQLPMA    | ASV         | AATTFPSMAR     | PAARGIVAGA     | AASTVPLPRA    |            |    | 67 |
| ORYSA_IG_Chl3 | M           |            |            |              |             |            |             | AR             | PAARGIVAGA     | AASTVPLPRA    |            |    | 23 |
| PICSI_Chl     | MA          |            | STTAAA     | AA - LGRIAST | PNEQAVSSSS  | TSSPMARLAI | GSRWSASSS   | PRLRSVASSP     | LLLEVKSRFVF    |               |            |    | 67 |
| CHABR         | MA          |            | AAASTS     | SLRLGAVVAG   | PASSAASKS   | LSRQSSRALP | SSSSHAPVVC  | CKHSPSASSS     | SSSKISTTYK     |               |            |    | 68 |
| CHLRE_Chl     | MA          |            | LSMKMR     | ANARV - SGRR | VAAVAPRVVP  | FSSASSSVLR | SGFA - - -  |                |                |               |            |    | 42 |
| VOLCA_Chl     | MA          |            | LSMKMR     | ANARVSGRR    | VAAVAPRVVP  | FSSVAPVLR  | STFAP - - - |                |                |               |            |    | 43 |
| ZmPGK4_Chl    | MA          |            | SALVPA     | SFSLAHPA - - |             |            |             | -ARRPVNSTG     | PAAMLMLRRA     |               |            |    | 35 |
| MICSP_Chl     | MA          |            | AFAAAP     | ALSARAFFAK   | SSVRAKKTSTV | RAQARAAALK |             |                |                |               |            |    | 37 |
| SYNSP         | MA          |            |            |              |             |            |             |                |                |               |            |    | 2  |
| ORYSA_IG_Chl1 | MA          | YKINSHVG   | VRLIKQQQAP | HVAVAATTA    | SSPTQPPPPR  | ALPRPPPMAS | AAAPTTSLS   | LAARRAAAVG     | PAAASPLRRG     |               |            |    | 80 |
| BACME         | MN          |            |            |              |             |            |             |                |                |               |            |    | 2  |
| BACST         | MN          |            |            |              |             |            |             |                |                |               |            |    | 2  |
| THEMA         | - E         |            |            |              |             |            |             |                |                |               |            |    | 1  |
| THEAQ         | MR          |            |            |              |             |            |             |                |                |               |            |    | 2  |
| ASPNI         | MSLTS       |            |            |              |             |            |             |                |                |               |            |    | 5  |
| PENCI         | MSLSN       |            |            |              |             |            |             |                |                |               |            |    | 5  |
| YARLI         | MSLTN       |            |            |              |             |            |             |                |                |               |            |    | 5  |
| TRIIE         | MSLSN       |            |            |              |             |            |             |                |                |               |            |    | 5  |
| TRIVI         | MSLSN       |            |            |              |             |            |             |                |                |               |            |    | 5  |
| NEUCR         | MSLSN       |            |            |              |             |            |             |                |                |               |            |    | 5  |
| CANMA         | MSLSN       |            |            |              |             |            |             |                |                |               |            |    | 5  |
| KLULA         | MSLSS       |            |            |              |             |            |             |                |                |               |            |    | 5  |
| SACCE         | MSLSS       |            |            |              |             |            |             |                |                |               |            |    | 5  |
| RHINI_PGK1    | MSLSN       |            |            |              |             |            |             |                |                |               |            |    | 5  |
| RHINI_PGK2    | MSLSN       |            |            |              |             |            |             |                |                |               |            |    | 5  |
| HOMSA_PGK1    | MSLSN       |            |            |              |             |            |             |                |                |               |            |    | 5  |
| MUSMU_PGK1    | MSLSN       |            |            |              |             |            |             |                |                |               |            |    | 5  |
| GALGA         | MSLSN       |            |            |              |             |            |             |                |                |               |            |    | 5  |
| HOMSA_PGK2    | MSLSK       |            |            |              |             |            |             |                |                |               |            |    | 5  |
| MUSMU_PGK2    | MA LSA      |            |            |              |             |            |             |                |                |               |            |    | 5  |
| SCHMA         | MGLS        |            |            |              |             |            |             |                |                |               |            |    | 4  |
| DROME         | MAF - N     |            |            |              |             |            |             |                |                |               |            |    | 4  |
| PLAFA         | M - LGN     |            |            |              |             |            |             |                |                |               |            |    | 4  |
| TETTH         | M - LSR     |            |            |              |             |            |             |                |                |               |            |    | 4  |
| TRYBR_Gly     | MSTAPNAKNN  | ISL        |            |              |             |            |             |                |                |               |            |    | 13 |
| TRYCO_Gly     | MSHVTGVTSN  | IRI        |            |              |             |            |             |                |                |               |            |    | 13 |
| TRYCO_Cyt     | MT          |            |            |              |             |            |             |                |                |               |            |    | 5  |
| TRYBR_Cyt1    | MS          |            |            |              |             |            |             |                |                |               |            |    | 5  |
| TRYBR_Cyt2    | MT          |            |            |              |             |            |             |                |                |               |            |    | 5  |
| CRIFA_Cyt     | MS          |            |            |              |             |            |             |                |                |               |            |    | 5  |
| CRIFA_Gly     | MLLST - QS  | IPI        |            |              |             |            |             |                |                |               |            |    | 10 |
| CORGL         | MAV         |            |            |              |             |            |             |                |                |               |            |    | 3  |
| MYCLE         | MR          |            |            |              |             |            |             |                |                |               |            |    | 3  |
| XANFL         | M           |            |            |              |             |            |             |                |                |               |            |    | 2  |
| ZYMMO         | M           |            |            |              |             |            |             |                |                |               |            |    | 1  |
| ESCOO         | M           |            |            |              |             |            |             |                |                |               |            |    | 1  |
| HAEN          | M           |            |            |              |             |            |             |                |                |               |            |    | 1  |
| CHLRE_Cyt     | MQAD - DPAR | LRDQVNDLI  | AP -       |              |             |            |             |                |                |               |            |    | 20 |
| VOLCA_Cyt     | MAVSNYETQR  | PLRHVVVDLL | AP -       |              |             |            |             |                |                |               |            |    | 22 |
| METBR         | MSLPFY      |            |            |              |             |            |             |                |                |               |            |    | 6  |
| METFE         | M - EKEY    |            |            |              |             |            |             |                |                |               |            |    | 5  |
| PICSI_Cyt     | MAPYGCENG   | TRIGYSWDDG | LENDK      |              |             |            |             |                |                |               |            |    | 25 |
| MICSP_Cyt     | MTA         | RS         | RRV        |              |             |            |             |                |                |               |            |    | 9  |
| HALVA         | M           |            |            |              |             |            |             |                |                |               |            |    | 1  |

[illegible]





|               | 180   | 200   | 220   | 240       |
|---------------|-------|-------|-------|-----------|
| POPNI_Cyt     | ----- | ----- | ----- | ----- 4   |
| POPTR_Cyt2    | ----- | ----- | ----- | ----- 4   |
| POPTR_Cyt1    | ----- | ----- | ----- | ----- 4   |
| RICCO_Cyt     | ----- | ----- | ----- | ----- 4   |
| GOSHI_Cyt     | ----- | ----- | ----- | ----- 4   |
| VITVI_Cyt     | ----- | ----- | ----- | ----- 4   |
| SOLTU_Cyt     | ----- | ----- | ----- | ----- 4   |
| NICTA_Cyt     | ----- | ----- | ----- | ----- 4   |
| HELAN_Cyt     | ----- | ----- | ----- | ----- 4   |
| ARATH_Cyt     | ----- | ----- | ----- | ----- 4   |
| PISSA_Cyt     | ----- | ----- | ----- | ----- 4   |
| SORBI_Cyt1    | ----- | ----- | ----- | ----- 4   |
| ZmPGK3_Cyt    | ----- | ----- | ----- | ----- 4   |
| ORYSA_IG_Cyt  | ----- | ----- | ----- | ----- 4   |
| ORYSA_JG_Cyt  | ----- | ----- | ----- | ----- 4   |
| SORBI_Cyt2    | ----- | ----- | ----- | ----- 4   |
| ORYSA_JG_Cyt2 | ----- | ----- | ----- | ----- 4   |
| TRIAE_Cyt     | ----- | ----- | ----- | ----- 4   |
| POPNI_Chl     | ----- | ----- | ----- | ----- 79  |
| POPTR_Chl2    | ----- | ----- | ----- | ----- 79  |
| POPTR_Chl1    | ----- | ----- | ----- | ----- 79  |
| RICCO_Chl     | ----- | ----- | ----- | ----- 77  |
| NICTA_Chl     | ----- | ----- | ----- | ----- 78  |
| NICBE_Chl     | ----- | ----- | ----- | ----- 78  |
| SOLTU_Chl     | ----- | ----- | ----- | ----- 79  |
| MUSAC_Chl     | ----- | ----- | ----- | ----- 77  |
| VITVI_Chl1    | ----- | ----- | ----- | ----- 76  |
| VITVI_Chl2    | ----- | ----- | ----- | ----- 76  |
| ARATH_Chl2    | ----- | ----- | ----- | ----- 79  |
| ARATH_Chl1    | ----- | ----- | ----- | ----- 76  |
| SORBI_Chl     | ----- | ----- | ----- | ----- 81  |
| ZmPGK1_Chl    | ----- | ----- | ----- | ----- 78  |
| ZmPGK2_Chl    | ----- | ----- | ----- | ----- 75  |
| TRIAE_Chl     | ----- | ----- | ----- | ----- 75  |
| SPIOL_Chl     | ----- | ----- | ----- | ----- 31  |
| MUSAC_Cyt     | ----- | ----- | ----- | ----- 4   |
| ORYSA_IG_Chl  | ----- | ----- | ----- | ----- 85  |
| ORYSA_JG_Chl2 | ----- | ----- | ----- | ----- 118 |
| ORYSA_JG_Chl3 | ----- | ----- | ----- | ----- 74  |
| PICSI_Chl     | ----- | ----- | ----- | ----- 105 |
| CHABR         | ----- | ----- | ----- | ----- 118 |
| CHLRE_Chl     | ----- | ----- | ----- | ----- 62  |
| VOLCA_Chl     | ----- | ----- | ----- | ----- 63  |
| ZmPGK4_Chl    | ----- | ----- | ----- | ----- 86  |
| MICSP_Chl     | ----- | ----- | ----- | ----- 42  |
| SYNSP         | ----- | ----- | ----- | ----- 3   |
| ORYSA_JG_Chl1 | ----- | ----- | ----- | ----- 129 |
| BACME         | ----- | ----- | ----- | ----- 3   |
| BACST         | ----- | ----- | ----- | ----- 3   |
| THEMA         | ----- | ----- | ----- | ----- 2   |
| THEAQ         | ----- | ----- | ----- | ----- 2   |
| ASPNI         | ----- | ----- | ----- | ----- 6   |
| PENCI         | ----- | ----- | ----- | ----- 6   |
| YARLI         | ----- | ----- | ----- | ----- 6   |
| TRIIRE        | ----- | ----- | ----- | ----- 6   |
| TRIVI         | ----- | ----- | ----- | ----- 6   |
| NEUCR         | ----- | ----- | ----- | ----- 6   |
| CANMA         | ----- | ----- | ----- | ----- 6   |
| KLULA         | ----- | ----- | ----- | ----- 6   |
| SACCE         | ----- | ----- | ----- | ----- 6   |
| RHINI_PGK1    | ----- | ----- | ----- | ----- 6   |
| RHINI_PGK2    | ----- | ----- | ----- | ----- 6   |
| HOMSA_PGK1    | ----- | ----- | ----- | ----- 6   |
| MUSMU_PGK1    | ----- | ----- | ----- | ----- 6   |
| GALGA         | ----- | ----- | ----- | ----- 6   |
| HOMSA_PGK2    | ----- | ----- | ----- | ----- 6   |
| MUSMU_PGK2    | ----- | ----- | ----- | ----- 6   |
| SCHMA         | ----- | ----- | ----- | ----- 5   |
| DROME         | ----- | ----- | ----- | ----- 5   |
| PLAFA         | ----- | ----- | ----- | ----- 5   |
| TETTH         | ----- | ----- | ----- | ----- 5   |
| TRYBR_Gly     | ----- | ----- | ----- | ----- 14  |
| TRYCO_Gly     | ----- | ----- | ----- | ----- 14  |
| TRYCO_Cyt     | ----- | ----- | ----- | ----- 6   |
| TRYBR_Cyt1    | ----- | ----- | ----- | ----- 6   |
| TRYBR_Cyt2    | ----- | ----- | ----- | ----- 6   |
| CRIFA_Cyt     | ----- | ----- | ----- | ----- 6   |
| CRIFA_Gly     | ----- | ----- | ----- | ----- 11  |
| CORGL         | ----- | ----- | ----- | ----- 3   |
| MYCLE         | ----- | ----- | ----- | ----- 3   |
| XANFL         | ----- | ----- | ----- | ----- 4   |
| ZYMMO         | ----- | ----- | ----- | ----- 3   |
| ESCCO         | ----- | ----- | ----- | ----- 1   |
| HAEIN         | ----- | ----- | ----- | ----- 1   |
| CHLRE_Cyt     | ----- | ----- | ----- | ----- 21  |
| VOLCA_Cyt     | ----- | ----- | ----- | ----- 23  |
| METBR         | ----- | ----- | ----- | ----- 6   |
| METFE         | ----- | ----- | ----- | ----- 5   |
| PICSI_Cyt     | ----- | ----- | ----- | ----- 28  |
| MICSP_Cyt     | ----- | ----- | ----- | ----- 9   |
| HALVA         | ----- | ----- | ----- | ----- 4   |



|               | 260   | 280   | 300   | 320   |     |
|---------------|-------|-------|-------|-------|-----|
| POPNI_Cyt     | ----- | ----- | ----- | ----- | 4   |
| POPTR_Cyt2    | ----- | ----- | ----- | ----- | 4   |
| POPTR_Cyt1    | ----- | ----- | ----- | ----- | 4   |
| RICCO_Cyt     | ----- | ----- | ----- | ----- | 4   |
| GOSHI_Cyt     | ----- | ----- | ----- | ----- | 4   |
| VITVI_Cyt     | ----- | ----- | ----- | ----- | 4   |
| SOLTU_Cyt     | ----- | ----- | ----- | ----- | 4   |
| NICTA_Cyt     | ----- | ----- | ----- | ----- | 4   |
| HELAN_Cyt     | ----- | ----- | ----- | ----- | 4   |
| ARATH_Cyt     | ----- | ----- | ----- | ----- | 4   |
| PISSA_Cyt     | ----- | ----- | ----- | ----- | 4   |
| SORBI_Cyt1    | ----- | ----- | ----- | ----- | 4   |
| ZmPGK3_Cyt    | ----- | ----- | ----- | ----- | 4   |
| ORYSA_IG_Cyt  | ----- | ----- | ----- | ----- | 4   |
| ORYSA_JG_Cyt  | ----- | ----- | ----- | ----- | 4   |
| SORBI_Cyt2    | ----- | ----- | ----- | ----- | 4   |
| ORYSA_JG_Cyt2 | ----- | ----- | ----- | ----- | 4   |
| TRIAE_Cyt     | ----- | ----- | ----- | ----- | 4   |
| POPNI_Chl     | ----- | ----- | ----- | ----- | 79  |
| POPTR_Chl2    | ----- | ----- | ----- | ----- | 79  |
| POPTR_Chl1    | ----- | ----- | ----- | ----- | 79  |
| RICCO_Chl     | ----- | ----- | ----- | ----- | 77  |
| NICTA_Chl     | ----- | ----- | ----- | ----- | 78  |
| NICBE_Chl     | ----- | ----- | ----- | ----- | 78  |
| SOLTU_Chl     | ----- | ----- | ----- | ----- | 79  |
| MUSAC_Chl     | ----- | ----- | ----- | ----- | 77  |
| VITVI_Chl1    | ----- | ----- | ----- | ----- | 76  |
| VITVI_Chl2    | ----- | ----- | ----- | ----- | 76  |
| ARATH_Chl2    | ----- | ----- | ----- | ----- | 79  |
| ARATH_Chl1    | ----- | ----- | ----- | ----- | 76  |
| SORBI_Chl     | ----- | ----- | ----- | ----- | 81  |
| ZmPGK1_Chl    | ----- | ----- | ----- | ----- | 78  |
| ZmPGK2_Chl    | ----- | ----- | ----- | ----- | 75  |
| TRIAE_Chl     | ----- | ----- | ----- | ----- | 75  |
| SPIOL_Chl     | ----- | ----- | ----- | ----- | 31  |
| MUSAC_Cyt     | ----- | ----- | ----- | ----- | 4   |
| ORYSA_IG_Chl  | ----- | ----- | ----- | ----- | 85  |
| ORYSA_JG_Chl2 | ----- | ----- | ----- | ----- | 118 |
| ORYSA_JG_Chl3 | ----- | ----- | ----- | ----- | 74  |
| PICSI_Chl     | ----- | ----- | ----- | ----- | 105 |
| CHABR         | ----- | ----- | ----- | ----- | 118 |
| CHLRE_Chl     | ----- | ----- | ----- | ----- | 62  |
| VOLCA_Chl     | ----- | ----- | ----- | ----- | 63  |
| ZmPGK4_Chl    | ----- | ----- | ----- | ----- | 86  |
| MICSP_Chl     | ----- | ----- | ----- | ----- | 42  |
| SYNSP         | ----- | ----- | ----- | ----- | 3   |
| ORYSA_JG_Chl1 | ----- | ----- | ----- | ----- | 129 |
| BACME         | ----- | ----- | ----- | ----- | 3   |
| BACST         | ----- | ----- | ----- | ----- | 3   |
| THEMA         | ----- | ----- | ----- | ----- | 2   |
| THEAQ         | ----- | ----- | ----- | ----- | 2   |
| ASPNI         | ----- | ----- | ----- | ----- | 6   |
| PENCI         | ----- | ----- | ----- | ----- | 6   |
| YARLI         | ----- | ----- | ----- | ----- | 6   |
| TRIIRE        | ----- | ----- | ----- | ----- | 6   |
| TRIVI         | ----- | ----- | ----- | ----- | 6   |
| NEUCR         | ----- | ----- | ----- | ----- | 6   |
| CANMA         | ----- | ----- | ----- | ----- | 6   |
| KLULA         | ----- | ----- | ----- | ----- | 6   |
| SACCE         | ----- | ----- | ----- | ----- | 6   |
| RHINI_PGK1    | ----- | ----- | ----- | ----- | 6   |
| RHINI_PGK2    | ----- | ----- | ----- | ----- | 6   |
| HOMSA_PGK1    | ----- | ----- | ----- | ----- | 6   |
| MUSMU_PGK1    | ----- | ----- | ----- | ----- | 6   |
| GALGA         | ----- | ----- | ----- | ----- | 6   |
| HOMSA_PGK2    | ----- | ----- | ----- | ----- | 6   |
| MUSMU_PGK2    | ----- | ----- | ----- | ----- | 6   |
| SCHMA         | ----- | ----- | ----- | ----- | 5   |
| DROME         | ----- | ----- | ----- | ----- | 5   |
| PLAFA         | ----- | ----- | ----- | ----- | 5   |
| TETTH         | ----- | ----- | ----- | ----- | 5   |
| TRYBR_Gly     | ----- | ----- | ----- | ----- | 14  |
| TRYCO_Gly     | ----- | ----- | ----- | ----- | 14  |
| TRYCO_Cyt     | ----- | ----- | ----- | ----- | 6   |
| TRYBR_Cyt1    | ----- | ----- | ----- | ----- | 6   |
| TRYBR_Cyt2    | ----- | ----- | ----- | ----- | 6   |
| CRIFA_Cyt     | ----- | ----- | ----- | ----- | 6   |
| CRIFA_Gly     | ----- | ----- | ----- | ----- | 11  |
| CORGL         | ----- | ----- | ----- | ----- | 3   |
| MYCLE         | ----- | ----- | ----- | ----- | 3   |
| XANFL         | ----- | ----- | ----- | ----- | 4   |
| ZYMMO         | ----- | ----- | ----- | ----- | 3   |
| ESCCO         | ----- | ----- | ----- | ----- | 1   |
| HAEIN         | ----- | ----- | ----- | ----- | 1   |
| CHLRE_Cyt     | ----- | ----- | ----- | ----- | 21  |
| VOLCA_Cyt     | ----- | ----- | ----- | ----- | 23  |
| METBR         | ----- | ----- | ----- | ----- | 6   |
| METFE         | ----- | ----- | ----- | ----- | 5   |
| PICSI_Cyt     | ----- | ----- | ----- | ----- | 28  |
| MICSP_Cyt     | ----- | ----- | ----- | ----- | 9   |
| HALVA         | ----- | ----- | ----- | ----- | 4   |





|               | 340 | 360 | 380 | 400 |
|---------------|-----|-----|-----|-----|
| POPNI_Cyt     |     |     |     | 4   |
| POPTR_Cyt2    |     |     |     | 4   |
| POPTR_Cyt1    |     |     |     | 4   |
| RICCO_Cyt     |     |     |     | 4   |
| GOSHI_Cyt     |     |     |     | 4   |
| VITVI_Cyt     |     |     |     | 4   |
| SOLTU_Cyt     |     |     |     | 4   |
| NICTA_Cyt     |     |     |     | 4   |
| HELAN_Cyt     |     |     |     | 4   |
| ARATH_Cyt     |     |     |     | 4   |
| PISSA_Cyt     |     |     |     | 4   |
| SORBI_Cyt1    |     |     |     | 4   |
| ZmPGK3_Cyt    |     |     |     | 4   |
| ORYSA_IG_Cyt  |     |     |     | 4   |
| ORYSA_JG_Cyt  |     |     |     | 4   |
| SORBI_Cyt2    |     |     |     | 4   |
| ORYSA_JG_Cyt2 |     |     |     | 4   |
| TRIAE_Cyt     |     |     |     | 4   |
| POPNI_Chl     |     |     |     | 79  |
| POPTR_Chl2    |     |     |     | 79  |
| POPTR_Chl1    |     |     |     | 79  |
| RICCO_Chl     |     |     |     | 77  |
| NICTA_Chl     |     |     |     | 78  |
| NICBE_Chl     |     |     |     | 78  |
| SOLTU_Chl     |     |     |     | 79  |
| MUSAC_Chl     |     |     |     | 77  |
| VITVI_Chl1    |     |     |     | 76  |
| VITVI_Chl2    |     |     |     | 76  |
| ARATH_Chl2    |     |     |     | 79  |
| ARATH_Chl1    |     |     |     | 76  |
| SORBI_Chl     |     |     |     | 81  |
| ZmPGK1_Chl    |     |     |     | 78  |
| ZmPGK2_Chl    |     |     |     | 75  |
| TRIAE_Chl     |     |     |     | 75  |
| SPIOL_Chl     |     |     |     | 31  |
| MUSAC_Cyt     |     |     |     | 4   |
| ORYSA_IG_Chl  |     |     |     | 85  |
| ORYSA_JG_Chl2 |     |     |     | 118 |
| ORYSA_JG_Chl3 |     |     |     | 74  |
| PICSI_Chl     |     |     |     | 105 |
| CHABR         |     |     |     | 118 |
| CHLRE_Chl     |     |     |     | 62  |
| VOLCA_Chl     |     |     |     | 63  |
| ZmPGK4_Chl    |     |     |     | 86  |
| MICSP_Chl     |     |     |     | 42  |
| SYNSP         |     |     |     | 3   |
| ORYSA_JG_Chl1 |     |     |     | 129 |
| BACME         |     |     |     | 3   |
| BACST         |     |     |     | 3   |
| THEMA         |     |     |     | 2   |
| THEAQ         |     |     |     | 2   |
| ASPNI         |     |     |     | 6   |
| PENCI         |     |     |     | 6   |
| YARLI         |     |     |     | 6   |
| TRIIRE        |     |     |     | 6   |
| TRIVI         |     |     |     | 6   |
| NEUCR         |     |     |     | 6   |
| CANMA         |     |     |     | 6   |
| KLULA         |     |     |     | 6   |
| SACCE         |     |     |     | 6   |
| RHINI_PGK1    |     |     |     | 6   |
| RHINI_PGK2    |     |     |     | 6   |
| HOMSA_PGK1    |     |     |     | 6   |
| MUSMU_PGK1    |     |     |     | 6   |
| GALGA         |     |     |     | 6   |
| HOMSA_PGK2    |     |     |     | 6   |
| MUSMU_PGK2    |     |     |     | 6   |
| SCHMA         |     |     |     | 5   |
| DROME         |     |     |     | 5   |
| PLAFA         |     |     |     | 5   |
| TETTH         |     |     |     | 5   |
| TRYBR_Gly     |     |     |     | 14  |
| TRYCO_Gly     |     |     |     | 14  |
| TRYCO_Cyt     |     |     |     | 6   |
| TRYBR_Cyt1    |     |     |     | 6   |
| TRYBR_Cyt2    |     |     |     | 6   |
| CRIFA_Cyt     |     |     |     | 6   |
| CRIFA_Gly     |     |     |     | 11  |
| CORGL         |     |     |     | 3   |
| MYCLE         |     |     |     | 3   |
| XANFL         |     |     |     | 4   |
| ZYMMO         |     |     |     | 3   |
| ESCCO         |     |     |     | 1   |
| HAEIN         |     |     |     | 1   |
| CHLRE_Cyt     |     |     |     | 21  |
| VOLCA_Cyt     |     |     |     | 23  |
| METBR         |     |     |     | 6   |
| METFE         |     |     |     | 5   |
| PICSI_Cyt     |     |     |     | 28  |
| MICSP_Cyt     |     |     |     | 9   |
| HALVA         |     |     |     | 4   |



|               |       | 420   | 440   | 460   | 480 |
|---------------|-------|-------|-------|-------|-----|
| POPNI_Cyt     | ----- | ----- | ----- | ----- | 36  |
| POPTR_Cyt2    | ----- | ----- | ----- | ----- | 36  |
| POPTR_Cyt1    | ----- | ----- | ----- | ----- | 36  |
| RICCO_Cyt     | ----- | ----- | ----- | ----- | 36  |
| GOSHI_Cyt     | ----- | ----- | ----- | ----- | 36  |
| VITVI_Cyt     | ----- | ----- | ----- | ----- | 36  |
| SOLTU_Cyt     | ----- | ----- | ----- | ----- | 36  |
| NICTA_Cyt     | ----- | ----- | ----- | ----- | 36  |
| HELAN_Cyt     | ----- | ----- | ----- | ----- | 36  |
| ARATH_Cyt     | ----- | ----- | ----- | ----- | 36  |
| PISSA_Cyt     | ----- | ----- | ----- | ----- | 36  |
| SORBI_Cyt1    | ----- | ----- | ----- | ----- | 36  |
| ZmPGK3_Cyt    | ----- | ----- | ----- | ----- | 36  |
| ORYSA_IG_Cyt  | ----- | ----- | ----- | ----- | 36  |
| ORYSA_IG_Cyt  | ----- | ----- | ----- | ----- | 36  |
| SORBI_Cyt2    | ----- | ----- | ----- | ----- | 36  |
| ORYSA_IG_Cyt2 | ----- | ----- | ----- | ----- | 36  |
| TRIAE_Cyt     | ----- | ----- | ----- | ----- | 36  |
| POPNI_Chl     | ----- | ----- | ----- | ----- | 111 |
| POPTR_Chl2    | ----- | ----- | ----- | ----- | 111 |
| POPTR_Chl1    | ----- | ----- | ----- | ----- | 111 |
| RICCO_Chl     | ----- | ----- | ----- | ----- | 109 |
| NICTA_Chl     | ----- | ----- | ----- | ----- | 110 |
| NICBE_Chl     | ----- | ----- | ----- | ----- | 110 |
| SOLTU_Chl     | ----- | ----- | ----- | ----- | 111 |
| MUSAC_Chl     | ----- | ----- | ----- | ----- | 109 |
| VITVI_Chl1    | ----- | ----- | ----- | ----- | 108 |
| VITVI_Chl2    | ----- | ----- | ----- | ----- | 108 |
| ARATH_Chl2    | ----- | ----- | ----- | ----- | 111 |
| ARATH_Chl1    | ----- | ----- | ----- | ----- | 108 |
| SORBI_Chl     | ----- | ----- | ----- | ----- | 113 |
| ZmPGK1_Chl    | ----- | ----- | ----- | ----- | 110 |
| ZmPGK2_Chl    | ----- | ----- | ----- | ----- | 107 |
| TRIAE_Chl     | ----- | ----- | ----- | ----- | 107 |
| SPIOL_Chl     | ----- | ----- | ----- | ----- | 63  |
| MUSAC_Cyt     | ----- | ----- | ----- | ----- | 36  |
| ORYSA_IG_Chl  | ----- | ----- | ----- | ----- | 117 |
| ORYSA_IG_Chl2 | ----- | ----- | ----- | ----- | 150 |
| ORYSA_IG_Chl3 | ----- | ----- | ----- | ----- | 106 |
| PICSI_Chl     | ----- | ----- | ----- | ----- | 137 |
| CHABR         | ----- | ----- | ----- | ----- | 150 |
| CHLRE_Chl     | ----- | ----- | ----- | ----- | 95  |
| VOLCA_Chl     | ----- | ----- | ----- | ----- | 96  |
| ZmPGK4_Chl    | ----- | ----- | ----- | ----- | 118 |
| MICSP_Chl     | ----- | ----- | ----- | ----- | 74  |
| SYNSP         | ----- | ----- | ----- | ----- | 35  |
| ORYSA_IG_Chl1 | ----- | ----- | ----- | ----- | 161 |
| BACME         | ----- | ----- | ----- | ----- | 31  |
| BACST         | ----- | ----- | ----- | ----- | 31  |
| THEMA         | ----- | ----- | ----- | ----- | 30  |
| THEAQ         | ----- | ----- | ----- | ----- | 37  |
| ASPN1         | ----- | ----- | ----- | ----- | 29  |
| PENCI         | ----- | ----- | ----- | ----- | 35  |
| YARLI         | ----- | ----- | ----- | ----- | 34  |
| TRIRE         | ----- | ----- | ----- | ----- | 35  |
| TRIVI         | ----- | ----- | ----- | ----- | 41  |
| NEUCR         | ----- | ----- | ----- | ----- | 35  |
| CANMA         | ----- | ----- | ----- | ----- | 34  |
| KLULA         | ----- | ----- | ----- | ----- | 34  |
| SACCE         | ----- | ----- | ----- | ----- | 34  |
| RHINI_PGK1    | ----- | ----- | ----- | ----- | 34  |
| RHINI_PGK2    | ----- | ----- | ----- | ----- | 34  |
| HOMSA_PGK1    | ----- | ----- | ----- | ----- | 34  |
| MUSMU_PGK1    | ----- | ----- | ----- | ----- | 34  |
| GALGA         | ----- | ----- | ----- | ----- | 34  |
| HOMSA_PGK2    | ----- | ----- | ----- | ----- | 34  |
| MUSMU_PGK2    | ----- | ----- | ----- | ----- | 34  |
| SCHMA         | ----- | ----- | ----- | ----- | 33  |
| DROME         | ----- | ----- | ----- | ----- | 33  |
| PLAFA         | ----- | ----- | ----- | ----- | 35  |
| TETTH         | ----- | ----- | ----- | ----- | 34  |
| TRYBR_Gly     | ----- | ----- | ----- | ----- | 43  |
| TRYCO_Gly     | ----- | ----- | ----- | ----- | 43  |
| TRYBR_Cyt1    | ----- | ----- | ----- | ----- | 34  |
| TRYBR_Cyt2    | ----- | ----- | ----- | ----- | 34  |
| CRIFA_Cyt     | ----- | ----- | ----- | ----- | 34  |
| CRIFA_Gly     | ----- | ----- | ----- | ----- | 40  |
| CORGL         | ----- | ----- | ----- | ----- | 35  |
| MYCLE         | ----- | ----- | ----- | ----- | 35  |
| XANFL         | ----- | ----- | ----- | ----- | 33  |
| ZYMMO         | ----- | ----- | ----- | ----- | 32  |
| ESCCO         | ----- | ----- | ----- | ----- | 31  |
| HAEin         | ----- | ----- | ----- | ----- | 31  |
| CHLRE_Cyt     | ----- | ----- | ----- | ----- | 51  |
| VOLCA_Cyt     | ----- | ----- | ----- | ----- | 56  |
| METBR         | ----- | ----- | ----- | ----- | 35  |
| METFE         | ----- | ----- | ----- | ----- | 34  |
| PICSI_Cyt     | ----- | ----- | ----- | ----- | 58  |
| MICSP_Cyt     | ----- | ----- | ----- | ----- | 33  |
| HALVA         | ----- | ----- | ----- | ----- | 31  |

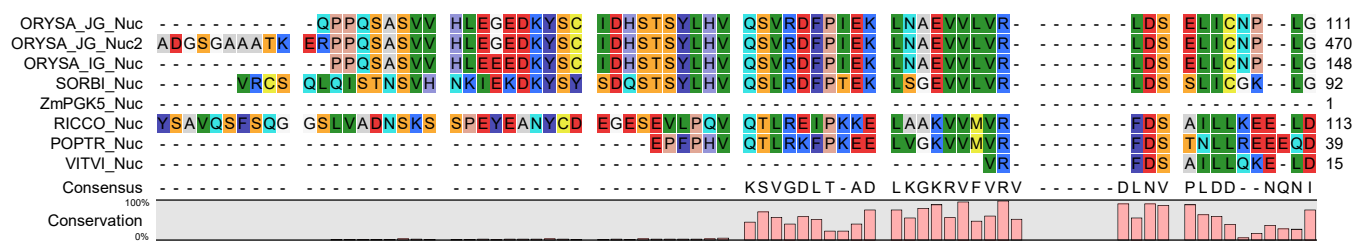

|           | 500 |   |   |   |   |   |   |   |   |   | 520 |   |   |   |   |   |   |   |   |   | 540 |   |   |   |   |   |   |   |   |   | 560 |   |   |   |   |   |   |   |   |   |   |   |   |   |   |   |   |   |   |   |   |   |   |   |   |   |   |   |   |   |   |   |   |   |   |   |   |   |   |   |   |   |   |   |   |   |   |   |   |   |   |   |   |   |   |   |   |   |   |   |   |   |   |   |   |   |   |   |   |   |   |   |   |   |   |   |   |   |   |   |   |   |   |   |   |   |   |   |   |   |   |   |   |   |   |   |   |   |   |   |   |   |   |   |   |   |   |   |   |   |   |   |   |   |   |   |   |   |   |   |   |   |   |   |   |   |   |   |   |   |   |   |   |   |   |   |   |   |   |   |   |   |   |   |   |   |   |   |   |   |   |   |   |   |   |   |   |   |   |   |   |   |   |   |   |   |   |   |   |   |   |   |   |   |   |   |   |   |   |   |   |   |   |   |   |   |   |   |   |   |   |   |   |   |   |   |   |   |   |   |   |   |   |   |   |   |   |   |   |   |   |   |   |   |   |   |   |   |   |   |   |   |   |   |   |   |   |   |   |   |   |   |   |   |   |   |   |   |   |   |   |   |   |   |   |   |   |   |   |   |   |   |   |   |   |   |   |   |   |   |   |   |   |   |   |   |   |   |   |   |   |   |   |   |   |   |   |   |   |   |   |   |   |   |   |   |   |   |   |   |   |   |   |   |   |   |   |   |   |   |   |   |   |   |   |   |   |   |   |   |   |   |   |   |   |   |   |   |   |   |   |   |   |   |   |   |   |   |   |   |   |   |   |   |   |   |   |   |   |   |   |   |   |   |   |   |   |   |   |   |   |   |   |   |   |   |   |   |   |   |   |   |   |   |   |   |   |   |   |   |   |   |   |   |   |   |   |   |   |   |   |   |   |   |   |   |   |   |   |   |   |   |   |   |   |   |   |   |   |   |   |   |   |   |   |   |   |   |   |   |   |   |   |   |   |   |   |   |   |   |   |   |   |   |   |   |   |   |   |   |   |   |   |   |   |   |   |   |   |   |   |   |   |   |   |   |   |   |   |   |   |   |   |   |   |   |   |   |   |   |   |   |   |   |   |   |   |   |   |   |   |   |   |   |   |   |   |   |   |   |   |   |   |   |   |   |   |   |   |   |   |   |   |   |   |   |   |   |   |   |   |   |   |   |   |   |   |   |   |   |   |   |   |   |   |   |   |   |   |   |   |   |   |   |   |   |   |   |   |   |   |   |   |   |   |   |   |   |   |   |   |   |   |   |   |   |   |   |   |   |   |   |   |   |   |   |   |   |   |   |   |   |   |   |   |   |   |   |   |   |   |   |   |   |   |   |   |   |   |   |   |   |   |   |   |   |   |   |   |   |   |   |   |   |   |   |   |   |   |   |   |   |   |   |   |   |   |   |   |   |   |   |   |   |   |   |   |   |   |   |   |   |   |   |   |   |   |   |   |   |   |   |   |   |   |   |   |   |   |   |   |   |   |   |   |   |   |   |   |   |   |   |   |   |   |   |   |   |   |   |   |   |   |   |   |   |   |   |   |   |   |   |   |   |   |   |   |   |   |   |   |   |   |   |   |   |   |   |   |   |   |   |   |   |   |   |   |   |   |   |   |   |   |   |   |   |   |   |   |   |   |   |   |   |   |   |   |   |   |   |   |   |   |   |   |   |   |   |   |   |   |   |   |   |   |   |   |   |   |   |   |   |   |   |   |   |   |   |   |   |   |   |   |   |   |   |   |   |   |   |   |   |   |   |   |   |   |   |   |   |   |   |   |   |   |   |   |   |   |   |   |   |   |   |   |   |   |   |   |   |   |   |   |   |   |   |   |   |   |   |   |   |   |   |   |   |   |   |   |   |   |   |   |   |   |   |   |   |   |   |   |   |   |   |   |   |   |   |   |   |   |   |   |   |   |   |   |   |   |   |   |   |   |   |   |   |   |   |   |   |   |   |   |   |   |   |   |   |   |   |   |   |   |   |   |   |   |   |   |   |   |   |   |   |   |   |   |   |   |   |   |   |   |   |   |   |   |   |   |   |   |   |   |   |   |   |   |   |   |   |   |   |   |   |   |   |   |   |   |   |   |   |   |   |   |   |   |   |   |   |   |   |   |   |   |   |   |   |   |   |   |   |   |   |   |   |   |   |   |   |   |   |   |   |   |   |   |   |   |   |   |   |   |   |   |   |   |   |   |   |   |   |   |   |   |   |   |   |   |   |   |   |   |   |   |   |   |   |   |   |   |   |   |   |   |   |   |   |   |   |   |   |   |   |   |   |   |   |   |   |   |   |   |   |   |   |   |   |   |   |   |   |   |   |   |   |   |   |   |   |   |   |   |   |   |   |   |   |   |   |   |   |   |   |   |   |   |   |   |   |   |   |   |   |   |   |   |   |   |   |   |   |   |   |   |   |   |   |   |   |   |   |   |   |   |   |   |   |   |   |   |   |   |   |   |   |   |   |   |   |   |   |   |   |   |   |   |   |   |   |   |   |   |   |   |   |   |   |   |   |   |   |   |   |   |   |   |   |   |   |   |   |   |   |   |   |   |   |   |   |   |   |   |   |   |   |   |   |   |   |   |   |   |   |   |   |   |   |   |   |   |   |   |   |   |   |   |   |   |   |   |   |   |   |   |   |   |   |   |   |   |   |   |   |   |   |   |   |   |   |   |   |   |   |   |   |   |   |   |   |   |   |   |   |   |   |   |   |   |
|-----------|-----|---|---|---|---|---|---|---|---|---|-----|---|---|---|---|---|---|---|---|---|-----|---|---|---|---|---|---|---|---|---|-----|---|---|---|---|---|---|---|---|---|---|---|---|---|---|---|---|---|---|---|---|---|---|---|---|---|---|---|---|---|---|---|---|---|---|---|---|---|---|---|---|---|---|---|---|---|---|---|---|---|---|---|---|---|---|---|---|---|---|---|---|---|---|---|---|---|---|---|---|---|---|---|---|---|---|---|---|---|---|---|---|---|---|---|---|---|---|---|---|---|---|---|---|---|---|---|---|---|---|---|---|---|---|---|---|---|---|---|---|---|---|---|---|---|---|---|---|---|---|---|---|---|---|---|---|---|---|---|---|---|---|---|---|---|---|---|---|---|---|---|---|---|---|---|---|---|---|---|---|---|---|---|---|---|---|---|---|---|---|---|---|---|---|---|---|---|---|---|---|---|---|---|---|---|---|---|---|---|---|---|---|---|---|---|---|---|---|---|---|---|---|---|---|---|---|---|---|---|---|---|---|---|---|---|---|---|---|---|---|---|---|---|---|---|---|---|---|---|---|---|---|---|---|---|---|---|---|---|---|---|---|---|---|---|---|---|---|---|---|---|---|---|---|---|---|---|---|---|---|---|---|---|---|---|---|---|---|---|---|---|---|---|---|---|---|---|---|---|---|---|---|---|---|---|---|---|---|---|---|---|---|---|---|---|---|---|---|---|---|---|---|---|---|---|---|---|---|---|---|---|---|---|---|---|---|---|---|---|---|---|---|---|---|---|---|---|---|---|---|---|---|---|---|---|---|---|---|---|---|---|---|---|---|---|---|---|---|---|---|---|---|---|---|---|---|---|---|---|---|---|---|---|---|---|---|---|---|---|---|---|---|---|---|---|---|---|---|---|---|---|---|---|---|---|---|---|---|---|---|---|---|---|---|---|---|---|---|---|---|---|---|---|---|---|---|---|---|---|---|---|---|---|---|---|---|---|---|---|---|---|---|---|---|---|---|---|---|---|---|---|---|---|---|---|---|---|---|---|---|---|---|---|---|---|---|---|---|---|---|---|---|---|---|---|---|---|---|---|---|---|---|---|---|---|---|---|---|---|---|---|---|---|---|---|---|---|---|---|---|---|---|---|---|---|---|---|---|---|---|---|---|---|---|---|---|---|---|---|---|---|---|---|---|---|---|---|---|---|---|---|---|---|---|---|---|---|---|---|---|---|---|---|---|---|---|---|---|---|---|---|---|---|---|---|---|---|---|---|---|---|---|---|---|---|---|---|---|---|---|---|---|---|---|---|---|---|---|---|---|---|---|---|---|---|---|---|---|---|---|---|---|---|---|---|---|---|---|---|---|---|---|---|---|---|---|---|---|---|---|---|---|---|---|---|---|---|---|---|---|---|---|---|---|---|---|---|---|---|---|---|---|---|---|---|---|---|---|---|---|---|---|---|---|---|---|---|---|---|---|---|---|---|---|---|---|---|---|---|---|---|---|---|---|---|---|---|---|---|---|---|---|---|---|---|---|---|---|---|---|---|---|---|---|---|---|---|---|---|---|---|---|---|---|---|---|---|---|---|---|---|---|---|---|---|---|---|---|---|---|---|---|---|---|---|---|---|---|---|---|---|---|---|---|---|---|---|---|---|---|---|---|---|---|---|---|---|---|---|---|---|---|---|---|---|---|---|---|---|---|---|---|---|---|---|---|---|---|---|---|---|---|---|---|---|---|---|---|---|---|---|---|---|---|---|---|---|---|---|---|---|---|---|---|---|---|---|---|---|---|---|---|---|---|---|---|---|---|---|---|---|---|---|---|---|---|---|---|---|---|---|---|---|---|---|---|---|---|---|---|---|---|---|---|---|---|---|---|---|---|---|---|---|---|---|---|---|---|---|---|---|---|---|---|---|---|---|---|---|---|---|---|---|---|---|---|---|---|---|---|---|---|---|---|---|---|---|---|---|---|---|---|---|---|---|---|---|---|---|---|---|---|---|---|---|---|---|---|---|---|---|---|---|---|---|---|---|---|---|---|---|---|---|---|---|---|---|---|---|---|---|---|---|---|---|---|---|---|---|---|---|---|---|---|---|---|---|---|---|---|---|---|---|---|---|---|---|---|---|---|---|---|---|---|---|---|---|---|---|---|---|---|---|---|---|---|---|---|---|---|---|---|---|---|---|---|---|---|---|---|---|---|---|---|---|---|---|---|---|---|---|---|---|---|---|---|---|---|---|---|---|---|---|---|---|---|---|---|---|---|---|---|---|---|---|---|---|---|---|---|---|---|---|---|---|---|---|---|---|---|---|---|---|---|---|---|---|---|---|---|---|---|---|---|---|---|---|---|---|---|---|---|---|---|---|---|---|---|---|---|---|---|---|---|---|---|---|---|---|---|---|---|---|---|---|---|---|---|---|---|---|---|---|---|---|---|---|---|---|---|---|---|---|---|---|---|---|---|---|---|---|---|---|---|---|---|---|---|---|---|---|---|---|---|---|---|---|---|---|---|---|---|---|---|---|---|---|---|---|---|---|---|---|---|---|---|---|---|---|---|---|---|---|---|---|---|---|---|---|---|---|---|---|---|---|---|---|---|---|---|---|---|---|---|---|---|---|---|---|---|---|---|---|---|---|---|---|---|---|---|---|---|---|---|---|---|---|---|---|---|---|---|---|---|---|---|---|---|---|---|---|---|---|---|---|---|---|---|---|---|---|---|---|---|---|---|---|---|---|---|---|---|---|---|---|---|---|---|---|---|
| POPNI_Cyt | T   | D | D | T | R | I | R | A | A | V | P   | T | V | K | Y | L | M | D | H | G | A   | R | - | V | I | L | C | S | H | L | G   | R | P | K | G | - | V | T | - | - | - | - | - | - | - | - | - | - | - | - | - | - | - | - | - | - | - | - | - | - | - | - | - | - | - | - | - | - | - | - | - | - | - | - | - | - | - | - | - | - | - | - | - | - | - | - | - | - | - | - | - | - | - | - | - | - | - | - | - | - | - | - | - | - | - | - | - | - | - | - | - | - | - | - | - | - | - | - | - | - | - | - | - | - | - | - | - | - | - | - | - | - | - | - | - | - | - | - | - | - | - | - | - | - | - | - | - | - | - | - | - | - | - | - | - | - | - | - | - | - | - | - | - | - | - | - | - | - | - | - | - | - | - | - | - | - | - | - | - | - | - | - | - | - | - | - | - | - | - | - | - | - | - | - | - | - | - | - | - | - | - | - | - | - | - | - | - | - | - | - | - | - | - | - | - | - | - | - | - | - | - | - | - | - | - | - | - | - | - | - | - | - | - | - | - | - | - | - | - | - | - | - | - | - | - | - | - | - | - | - | - | - | - | - | - | - | - | - | - | - | - | - | - | - | - | - | - | - | - | - | - | - | - | - | - | - | - | - | - | - | - | - | - | - | - | - | - | - | - | - | - | - | - | - | - | - | - | - | - | - | - | - | - | - | - | - | - | - | - | - | - | - | - | - | - | - | - | - | - | - | - | - | - | - | - | - | - | - | - | - | - | - | - | - | - | - | - | - | - | - | - | - | - | - | - | - | - | - | - | - | - | - | - | - | - | - | - | - | - | - | - | - | - | - | - | - | - | - | - | - | - | - | - | - | - | - | - | - | - | - | - | - | - | - | - | - | - | - | - | - | - | - | - | - | - | - | - | - | - | - | - | - | - | - | - | - | - | - | - | - | - | - | - | - | - | - | - | - | - | - | - | - | - | - | - | - | - | - | - | - | - | - | - | - | - | - | - | - | - | - | - | - | - | - | - | - | - | - | - | - | - | - | - | - | - | - | - | - | - | - | - | - | - | - | - | - | - | - | - | - | - | - | - | - | - | - | - | - | - | - | - | - | - | - | - | - | - | - | - | - | - | - | - | - | - | - | - | - | - | - | - | - | - | - | - | - | - | - | - | - | - | - | - | - | - | - | - | - | - | - | - | - | - | - | - | - | - | - | - | - | - | - | - | - | - | - | - | - | - | - | - | - | - | - | - | - | - | - | - | - | - | - | - | - | - | - | - | - | - | - | - | - | - | - | - | - | - | - | - | - | - | - | - | - | - | - | - | - | - | - | - | - | - | - | - | - | - | - | - | - | - | - | - | - | - | - | - | - | - | - | - | - | - | - | - | - | - | - | - | - | - | - | - | - | - | - | - | - | - | - | - | - | - | - | - | - | - | - | - | - | - | - | - | - | - | - | - | - | - | - | - | - | - | - | - | - | - | - | - | - | - | - | - | - | - | - | - | - | - | - | - | - | - | - | - | - | - | - | - | - | - | - | - | - | - | - | - | - | - | - | - | - | - | - | - | - | - | - | - | - | - | - | - | - | - | - | - | - | - | - | - | - | - | - | - | - | - | - | - | - | - | - | - | - | - | - | - | - | - | - | - | - | - | - | - | - | - | - | - | - | - | - | - | - | - | - | - | - | - | - | - | - | - | - | - | - | - | - | - | - | - | - | - | - | - | - | - | - | - | - | - | - | - | - | - | - | - | - | - | - | - | - | - | - | - | - | - | - | - | - | - | - | - | - | - | - | - | - | - | - | - | - | - | - | - | - | - | - | - | - | - | - | - | - | - | - | - | - | - | - | - | - | - | - | - | - | - | - | - | - | - | - | - | - | - | - | - | - | - | - | - | - | - | - | - | - | - | - | - | - | - | - | - | - | - | - | - | - | - | - | - | - | - | - | - | - | - | - | - | - | - | - | - | - | - | - | - | - | - | - | - | - | - | - | - | - | - | - | - | - | - | - | - | - | - | - | - | - | - | - | - | - | - | - | - | - | - | - | - | - | - | - | - | - | - | - | - | - | - | - | - | - | - | - | - | - | - | - | - | - | - | - | - | - | - | - | - | - | - | - | - | - | - | - | - | - | - | - | - | - | - | - | - | - | - | - | - | - | - | - | - | - | - | - | - | - | - | - | - | - | - | - | - | - | - | - | - | - | - | - | - | - | - | - | - | - | - | - | - | - | - | - | - | - | - | - | - | - | - | - | - | - | - | - | - | - | - | - | - | - | - | - | - | - | - | - | - | - | - | - | - | - | - | - | - | - | - | - | - | - | - | - | - | - | - | - | - | - | - | - | - | - | - | - | - | - | - | - | - | - | - | - | - | - | - | - | - | - | - | - | - | - | - | - | - | - | - | - | - | - | - | - | - | - | - | - | - | - | - | - | - | - | - | - | - | - | - | - | - | - | - | - | - | - | - | - | - | - | - | - | - | - | - | - | - | - | - | - | - | - | - | - | - | - | - | - | - | - | - | - | - | - | - | - | - | - | - | - | - | - | - | - | - | - | - | - | - | - | - | - | - | - | - | - | - | - | - | - | - | - | - | - | - | - | - | - | - | - | - | - | - | - | - | - | - | - | - | - | - | - | - | - | - | - | - | - | - | - | - | - | - | - | - | - | - | - | - | - | - | - | - | - | - | - | - | - | - | - | - | - | - | - | - | - | - | - | - | - | - | - | - | - | - | - | - | - | - | - | - | - | - | - | - | - | - | - | - | - | - |

|              |   |   |   |   |   |   |   |   |   |   |   |   |   |   |   |   |   |   |   |   |   |   |   |   |   |   |   |   |   |   |   |   |   |   |   |   |   |   |   |   |   |   |   |   |   |   |   |   |   |   |   |   |   |   |   |   |   |   |   |   |   |   |   |   |   |   |   |   |   |   |   |   |   |   |   |   |   |   |   |   |   |   |   |   |   |   |   |   |   |   |   |   |   |   |   |   |   |   |   |   |   |   |   |   |   |   |   |   |   |   |   |   |   |   |   |   |   |   |   |   |   |   |   |   |   |   |   |   |   |   |   |   |   |   |   |   |   |   |   |   |   |   |   |   |   |   |   |   |   |   |   |   |   |   |   |   |   |   |   |   |   |   |   |   |   |   |   |   |   |   |   |   |   |   |   |   |   |   |   |   |   |   |   |   |   |   |   |   |   |   |   |   |   |   |   |   |   |   |   |   |   |   |   |   |   |   |   |   |   |   |   |   |   |   |   |   |   |   |   |   |   |   |   |   |   |   |   |   |   |   |   |   |   |   |   |   |   |   |   |   |   |   |   |   |   |   |   |   |   |   |   |   |   |   |   |   |   |   |   |   |   |   |   |   |   |   |   |   |   |   |   |   |   |   |   |   |   |   |   |   |   |   |   |   |   |   |   |   |   |   |   |   |   |   |   |   |   |   |   |   |   |   |   |   |   |   |   |   |   |   |   |   |   |   |   |   |   |   |   |   |   |   |   |   |   |   |   |   |   |   |   |   |   |   |   |   |   |   |   |   |   |   |   |   |   |   |   |   |   |   |   |   |   |   |   |   |   |   |   |   |   |   |   |   |   |   |   |   |   |   |   |   |   |   |   |   |   |   |   |   |   |   |   |   |   |   |   |   |   |   |   |   |   |   |   |   |   |   |   |   |   |   |   |   |   |   |   |   |   |   |   |   |   |   |   |   |   |   |   |   |   |   |   |   |   |   |   |   |   |   |   |   |   |   |   |   |   |   |   |   |   |   |   |   |   |   |   |   |   |   |   |   |   |   |   |   |   |   |   |   |   |   |   |   |   |   |   |   |   |   |   |   |   |   |   |   |   |   |   |   |   |   |   |   |   |   |   |   |   |   |   |   |   |   |   |   |   |   |   |   |   |   |   |   |   |   |   |   |   |   |   |   |   |   |   |   |   |   |   |   |   |   |   |   |   |   |   |   |   |   |   |   |   |   |   |   |   |   |   |   |   |   |   |   |   |   |   |   |   |   |   |   |   |   |   |   |   |   |   |   |   |   |   |   |   |   |   |   |   |   |   |   |   |   |   |   |   |   |   |   |   |   |   |   |   |   |   |   |   |   |   |   |   |   |   |   |   |   |   |   |   |   |   |   |   |   |   |   |   |   |   |   |   |   |   |   |   |   |   |   |   |   |   |   |   |   |   |   |   |   |   |   |   |   |   |   |   |   |   |   |   |   |   |   |   |   |   |   |   |   |   |   |   |   |   |   |   |   |   |   |   |   |   |   |   |   |   |   |   |   |   |   |   |   |   |   |   |   |   |   |   |   |   |   |   |   |   |   |   |   |   |   |   |   |   |   |   |   |   |   |   |   |   |   |   |   |   |   |   |   |   |   |   |   |   |   |   |   |   |   |   |   |   |   |   |   |   |   |   |   |   |   |   |   |   |   |   |   |   |   |   |   |   |   |   |   |   |   |   |   |   |   |   |   |   |   |   |   |   |   |   |   |   |   |   |   |   |   |   |   |   |   |   |   |   |   |   |   |   |   |   |   |   |   |   |   |   |   |   |   |   |   |   |   |   |   |   |   |   |   |   |   |   |   |   |   |   |   |   |   |   |   |   |   |   |   |   |   |   |   |   |   |   |   |   |   |   |   |   |   |   |   |   |   |   |   |   |   |   |   |   |   |   |   |   |   |   |   |   |   |   |   |   |   |   |   |   |   |   |   |   |   |   |   |   |   |   |   |   |   |   |   |   |   |   |   |   |   |   |   |   |   |   |   |   |   |   |   |   |   |   |   |   |   |   |   |   |   |   |   |   |   |   |   |   |   |   |   |   |   |   |   |   |   |   |   |   |   |   |   |   |   |   |   |   |   |   |   |   |   |   |   |   |   |   |   |   |   |   |   |   |   |   |   |   |   |   |   |   |   |   |   |   |   |   |   |   |   |   |   |   |   |   |   |   |   |   |   |   |   |   |   |   |   |   |   |   |   |   |   |   |   |   |   |   |   |   |   |   |   |   |   |   |   |   |   |   |   |   |   |   |   |   |   |   |   |   |   |   |   |   |   |   |   |   |   |   |   |   |   |   |   |   |   |   |   |   |   |   |   |   |   |   |   |   |   |   |   |   |   |   |   |   |   |   |   |   |   |   |   |   |   |   |   |   |   |   |   |   |   |   |   |   |   |   |   |   |   |   |   |   |   |   |   |   |   |   |   |   |   |   |   |   |   |   |   |   |   |   |   |   |   |   |   |   |   |   |   |   |   |   |   |   |   |   |   |   |   |   |   |   |   |   |   |   |   |   |   |   |   |   |   |   |   |   |   |   |   |   |   |   |   |   |   |   |   |   |   |   |   |   |   |   |   |   |   |   |   |   |   |   |   |   |   |   |   |   |   |   |   |   |   |   |   |   |   |   |   |   |   |   |   |   |   |   |   |   |   |   |   |   |   |   |   |   |   |   |   |   |   |   |   |   |   |   |   |   |   |   |   |   |   |   |   |   |   |   |   |   |   |   |   |   |   |   |   |   |   |   |   |   |   |   |   |   |   |   |   |   |   |   |   |   |   |   |   |   |   |   |   |   |   |   |   |   |   |   |   |   |   |   |   |   |   |   |   |   |   |   |   |   |   |   |   |   |   |   |   |   |   |   |   |   |   |   |   |   |   |   |   |   |   |   |   |   |   |   |   |   |   |   |   |   |   |   |   |   |   |   |   |   |   |   |   |   |   |   |   |   |   |   |   |   |   |   |   |   |   |   |   |   |   |   |   |   |   |   |   |   |   |   |   |   |   |   |   |   |   |   |   |   |
|--------------|---|---|---|---|---|---|---|---|---|---|---|---|---|---|---|---|---|---|---|---|---|---|---|---|---|---|---|---|---|---|---|---|---|---|---|---|---|---|---|---|---|---|---|---|---|---|---|---|---|---|---|---|---|---|---|---|---|---|---|---|---|---|---|---|---|---|---|---|---|---|---|---|---|---|---|---|---|---|---|---|---|---|---|---|---|---|---|---|---|---|---|---|---|---|---|---|---|---|---|---|---|---|---|---|---|---|---|---|---|---|---|---|---|---|---|---|---|---|---|---|---|---|---|---|---|---|---|---|---|---|---|---|---|---|---|---|---|---|---|---|---|---|---|---|---|---|---|---|---|---|---|---|---|---|---|---|---|---|---|---|---|---|---|---|---|---|---|---|---|---|---|---|---|---|---|---|---|---|---|---|---|---|---|---|---|---|---|---|---|---|---|---|---|---|---|---|---|---|---|---|---|---|---|---|---|---|---|---|---|---|---|---|---|---|---|---|---|---|---|---|---|---|---|---|---|---|---|---|---|---|---|---|---|---|---|---|---|---|---|---|---|---|---|---|---|---|---|---|---|---|---|---|---|---|---|---|---|---|---|---|---|---|---|---|---|---|---|---|---|---|---|---|---|---|---|---|---|---|---|---|---|---|---|---|---|---|---|---|---|---|---|---|---|---|---|---|---|---|---|---|---|---|---|---|---|---|---|---|---|---|---|---|---|---|---|---|---|---|---|---|---|---|---|---|---|---|---|---|---|---|---|---|---|---|---|---|---|---|---|---|---|---|---|---|---|---|---|---|---|---|---|---|---|---|---|---|---|---|---|---|---|---|---|---|---|---|---|---|---|---|---|---|---|---|---|---|---|---|---|---|---|---|---|---|---|---|---|---|---|---|---|---|---|---|---|---|---|---|---|---|---|---|---|---|---|---|---|---|---|---|---|---|---|---|---|---|---|---|---|---|---|---|---|---|---|---|---|---|---|---|---|---|---|---|---|---|---|---|---|---|---|---|---|---|---|---|---|---|---|---|---|---|---|---|---|---|---|---|---|---|---|---|---|---|---|---|---|---|---|---|---|---|---|---|---|---|---|---|---|---|---|---|---|---|---|---|---|---|---|---|---|---|---|---|---|---|---|---|---|---|---|---|---|---|---|---|---|---|---|---|---|---|---|---|---|---|---|---|---|---|---|---|---|---|---|---|---|---|---|---|---|---|---|---|---|---|---|---|---|---|---|---|---|---|---|---|---|---|---|---|---|---|---|---|---|---|---|---|---|---|---|---|---|---|---|---|---|---|---|---|---|---|---|---|---|---|---|---|---|---|---|---|---|---|---|---|---|---|---|---|---|---|---|---|---|---|---|---|---|---|---|---|---|---|---|---|---|---|---|---|---|---|---|---|---|---|---|---|---|---|---|---|---|---|---|---|---|---|---|---|---|---|---|---|---|---|---|---|---|---|---|---|---|---|---|---|---|---|---|---|---|---|---|---|---|---|---|---|---|---|---|---|---|---|---|---|---|---|---|---|---|---|---|---|---|---|---|---|---|---|---|---|---|---|---|---|---|---|---|---|---|---|---|---|---|---|---|---|---|---|---|---|---|---|---|---|---|---|---|---|---|---|---|---|---|---|---|---|---|---|---|---|---|---|---|---|---|---|---|---|---|---|---|---|---|---|---|---|---|---|---|---|---|---|---|---|---|---|---|---|---|---|---|---|---|---|---|---|---|---|---|---|---|---|---|---|---|---|---|---|---|---|---|---|---|---|---|---|---|---|---|---|---|---|---|---|---|---|---|---|---|---|---|---|---|---|---|---|---|---|---|---|---|---|---|---|---|---|---|---|---|---|---|---|---|---|---|---|---|---|---|---|---|---|---|---|---|---|---|---|---|---|---|---|---|---|---|---|---|---|---|---|---|---|---|---|---|---|---|---|---|---|---|---|---|---|---|---|---|---|---|---|---|---|---|---|---|---|---|---|---|---|---|---|---|---|---|---|---|---|---|---|---|---|---|---|---|---|---|---|---|---|---|---|---|---|---|---|---|---|---|---|---|---|---|---|---|---|---|---|---|---|---|---|---|---|---|---|---|---|---|---|---|---|---|---|---|---|---|---|---|---|---|---|---|---|---|---|---|---|---|---|---|---|---|---|---|---|---|---|---|---|---|---|---|---|---|---|---|---|---|---|---|---|---|---|---|---|---|---|---|---|---|---|---|---|---|---|---|---|---|---|---|---|---|---|---|---|---|---|---|---|---|---|---|---|---|---|---|---|---|---|---|---|---|---|---|---|---|---|---|---|---|---|---|---|---|---|---|---|---|---|---|---|---|---|---|---|---|---|---|---|---|---|---|---|---|---|---|---|---|---|---|---|---|---|---|---|---|---|---|---|---|---|---|---|---|---|---|---|---|---|---|---|---|---|---|---|---|---|---|---|---|---|---|---|---|---|---|---|---|---|---|---|---|---|---|---|---|---|---|---|---|---|---|---|---|---|---|---|---|---|---|---|---|---|---|---|---|---|---|---|---|---|---|---|---|---|---|---|---|---|---|---|---|---|---|---|---|---|---|---|---|---|---|---|---|---|---|---|---|---|---|---|---|---|---|---|---|---|---|---|---|---|---|---|---|---|---|---|---|---|---|---|---|---|---|---|---|---|---|---|---|---|---|---|---|---|---|---|---|---|---|---|---|---|---|---|---|---|---|---|---|---|---|---|---|---|---|---|---|---|---|---|---|---|---|---|---|---|---|---|---|---|---|---|---|---|---|---|---|---|---|---|---|---|---|---|---|---|---|---|---|---|---|---|---|---|---|---|---|---|---|---|---|---|---|---|---|---|---|---|---|---|---|---|---|---|---|---|---|---|---|---|---|---|---|---|---|---|---|---|---|---|---|---|---|---|---|---|---|---|---|---|---|---|---|---|---|---|---|---|---|---|---|---|---|---|---|---|---|---|---|---|---|---|---|---|---|---|---|---|---|---|---|---|---|---|---|---|---|---|---|---|---|---|---|---|---|---|---|---|---|---|---|---|---|---|---|---|---|
| ORYSA_JG_Nuc | S | C | S | L | S | L | E | R | T | V | T | S | T | I | K | Y | L | Q | K | A | G | A | K | V | L | L | V | T | S | W | T | P | V | L | Q | S | V | Y | - | - | - | - | - | - | - | - | - | - | - | - | - | - | - | - | - | - | - | - | - | - | - | - | - | - | - | - | - | - | - | - | - | - | - | - | - | - | - | - | - | - | - | - | - | - | - | - | - | - | - | - | - | - | - | - | - | - | - | - | - | - | - | - | - | - | - | - | - | - | - | - | - | - | - | - | - | - | - | - | - | - | - | - | - | - | - | - | - | - | - | - | - | - | - | - | - | - | - | - | - | - | - | - | - | - | - | - | - | - | - | - | - | - | - | - | - | - | - | - | - | - | - | - | - | - | - | - | - | - | - | - | - | - | - | - | - | - | - | - | - | - | - | - | - | - | - | - | - | - | - | - | - | - | - | - | - | - | - | - | - | - | - | - | - | - | - | - | - | - | - | - | - | - | - | - | - | - | - | - | - | - | - | - | - | - | - | - | - | - | - | - | - | - | - | - | - | - | - | - | - | - | - | - | - | - | - | - | - | - | - | - | - | - | - | - | - | - | - | - | - | - | - | - | - | - | - | - | - | - | - | - | - | - | - | - | - | - | - | - | - | - | - | - | - | - | - | - | - | - | - | - | - | - | - | - | - | - | - | - | - | - | - | - | - | - | - | - | - | - | - | - | - | - | - | - | - | - | - | - | - | - | - | - | - | - | - | - | - | - | - | - | - | - | - | - | - | - | - | - | - | - | - | - | - | - | - | - | - | - | - | - | - | - | - | - | - | - | - | - | - | - | - | - | - | - | - | - | - | - | - | - | - | - | - | - | - | - | - | - | - | - | - | - | - | - | - | - | - | - | - | - | - | - | - | - | - | - | - | - | - | - | - | - | - | - | - | - | - | - | - | - | - | - | - | - | - | - | - | - | - | - | - | - | - | - | - | - | - | - | - | - | - | - | - | - | - | - | - | - | - | - | - | - | - | - | - | - | - | - | - | - | - | - | - | - | - | - | - | - | - | - | - | - | - | - | - | - | - | - | - | - | - | - | - | - | - | - | - | - | - | - | - | - | - | - | - | - | - | - | - | - | - | - | - | - | - | - | - | - | - | - | - | - | - | - | - | - | - | - | - | - | - | - | - | - | - | - | - | - | - | - | - | - | - | - | - | - | - | - | - | - | - | - | - | - | - | - | - | - | - | - | - | - | - | - | - | - | - | - | - | - | - | - | - | - | - | - | - | - | - | - | - | - | - | - | - | - | - | - | - | - | - | - | - | - | - | - | - | - | - | - | - | - | - | - | - | - | - | - | - | - | - | - | - | - | - | - | - | - | - | - | - | - | - | - | - | - | - | - | - | - | - | - | - | - | - | - | - | - | - | - | - | - | - | - | - | - | - | - | - | - | - | - | - | - | - | - | - | - | - | - | - | - | - | - | - | - | - | - | - | - | - | - | - | - | - | - | - | - | - | - | - | - | - | - | - | - | - | - | - | - | - | - | - | - | - | - | - | - | - | - | - | - | - | - | - | - | - | - | - | - | - | - | - | - | - | - | - | - | - | - | - | - | - | - | - | - | - | - | - | - | - | - | - | - | - | - | - | - | - | - | - | - | - | - | - | - | - | - | - | - | - | - | - | - | - | - | - | - | - | - | - | - | - | - | - | - | - | - | - | - | - | - | - | - | - | - | - | - | - | - | - | - | - | - | - | - | - | - | - | - | - | - | - | - | - | - | - | - | - | - | - | - | - | - | - | - | - | - | - | - | - | - | - | - | - | - | - | - | - | - | - | - | - | - | - | - | - | - | - | - | - | - | - | - | - | - | - | - | - | - | - | - | - | - | - | - | - | - | - | - | - | - | - | - | - | - | - | - | - | - | - | - | - | - | - | - | - | - | - | - | - | - | - | - | - | - | - | - | - | - | - | - | - | - | - | - | - | - | - | - | - | - | - | - | - | - | - | - | - | - | - | - | - | - | - | - | - | - | - | - | - | - | - | - | - | - | - | - | - | - | - | - | - | - | - | - | - | - | - | - | - | - | - | - | - | - | - | - | - | - | - | - | - | - | - | - | - | - | - | - | - | - | - | - | - | - | - | - | - | - | - | - | - | - | - | - | - | - | - | - | - | - | - | - | - | - | - | - | - | - | - | - | - | - | - | - | - | - | - | - | - | - | - | - | - | - | - | - | - | - | - | - | - | - | - | - | - | - | - | - | - | - | - | - | - | - | - | - | - | - | - | - | - | - | - | - | - | - | - | - | - | - | - | - | - | - | - | - | - | - | - | - | - | - | - | - | - | - | - | - | - | - | - | - | - | - | - | - | - | - | - | - | - | - | - | - | - | - | - | - | - | - | - | - | - | - | - | - | - | - | - | - | - | - | - | - | - | - | - | - | - | - | - | - | - | - | - | - | - | - | - | - | - | - | - | - | - | - | - | - | - | - | - | - | - | - | - | - | - | - | - | - | - | - | - | - | - | - | - | - | - | - | - | - | - | - | - | - | - | - | - | - | - | - | - | - | - | - | - | - | - | - | - | - | - | - | - | - | - | - | - | - | - | - | - | - | - | - | - | - | - | - | - | - | - | - | - | - | - | - | - | - | - | - | - | - | - | - | - | - | - | - | - | - | - | - | - | - | - | - | - | - | - | - | - | - | - | - | - | - | - | - | - | - | - | - | - | - | - | - | - | - | - | - | - | - | - | - | - | - | - | - | - | - | - | - | - | - | - | - | - | - | - | - | - | - | - | - | - | - | - | - | - | - | - | - | - | - | - | - | - | - | - | - | - | - | - | - | - | - | - | - | - | - | - | - | - | - | - | - | - | - | - | - | - | - | - | - | - | - | - | - | - | - | - | - | - | - | - | - | - | - | - | - | - | - | - | - | - | - | - | - | - | - | - | - | - | - | - | - | - | - | - | - | - | - | - | - | - | - | - | - | - | - | - | - | - | - | - | - | - | - | - | - | - | - | - | - | - | - | - | - | - | - | - | - | - | - | - | - | - |
|--------------|---|---|---|---|---|---|---|---|---|---|---|---|---|---|---|---|---|---|---|---|---|---|---|---|---|---|---|---|---|---|---|---|---|---|---|---|---|---|---|---|---|---|---|---|---|---|---|---|---|---|---|---|---|---|---|---|---|---|---|---|---|---|---|---|---|---|---|---|---|---|---|---|---|---|---|---|---|---|---|---|---|---|---|---|---|---|---|---|---|---|---|---|---|---|---|---|---|---|---|---|---|---|---|---|---|---|---|---|---|---|---|---|---|---|---|---|---|---|---|---|---|---|---|---|---|---|---|---|---|---|---|---|---|---|---|---|---|---|---|---|---|---|---|---|---|---|---|---|---|---|---|---|---|---|---|---|---|---|---|---|---|---|---|---|---|---|---|---|---|---|---|---|---|---|---|---|---|---|---|---|---|---|---|---|---|---|---|---|---|---|---|---|---|---|---|---|---|---|---|---|---|---|---|---|---|---|---|---|---|---|---|---|---|---|---|---|---|---|---|---|---|---|---|---|---|---|---|---|---|---|---|---|---|---|---|---|---|---|---|---|---|---|---|---|---|---|---|---|---|---|---|---|---|---|---|---|---|---|---|---|---|---|---|---|---|---|---|---|---|---|---|---|---|---|---|---|---|---|---|---|---|---|---|---|---|---|---|---|---|---|---|---|---|---|---|---|---|---|---|---|---|---|---|---|---|---|---|---|---|---|---|---|---|---|---|---|---|---|---|---|---|---|---|---|---|---|---|---|---|---|---|---|---|---|---|---|---|---|---|---|---|---|---|---|---|---|---|---|---|---|---|---|---|---|---|---|---|---|---|---|---|---|---|---|---|---|---|---|---|---|---|---|---|---|---|---|---|---|---|---|---|---|---|---|---|---|---|---|---|---|---|---|---|---|---|---|---|---|---|---|---|---|---|---|---|---|---|---|---|---|---|---|---|---|---|---|---|---|---|---|---|---|---|---|---|---|---|---|---|---|---|---|---|---|---|---|---|---|---|---|---|---|---|---|---|---|---|---|---|---|---|---|---|---|---|---|---|---|---|---|---|---|---|---|---|---|---|---|---|---|---|---|---|---|---|---|---|---|---|---|---|---|---|---|---|---|---|---|---|---|---|---|---|---|---|---|---|---|---|---|---|---|---|---|---|---|---|---|---|---|---|---|---|---|---|---|---|---|---|---|---|---|---|---|---|---|---|---|---|---|---|---|---|---|---|---|---|---|---|---|---|---|---|---|---|---|---|---|---|---|---|---|---|---|---|---|---|---|---|---|---|---|---|---|---|---|---|---|---|---|---|---|---|---|---|---|---|---|---|---|---|---|---|---|---|---|---|---|---|---|---|---|---|---|---|---|---|---|---|---|---|---|---|---|---|---|---|---|---|---|---|---|---|---|---|---|---|---|---|---|---|---|---|---|---|---|---|---|---|---|---|---|---|---|---|---|---|---|---|---|---|---|---|---|---|---|---|---|---|---|---|---|---|---|---|---|---|---|---|---|---|---|---|---|---|---|---|---|---|---|---|---|---|---|---|---|---|---|---|---|---|---|---|---|---|---|---|---|---|---|---|---|---|---|---|---|---|---|---|---|---|---|---|---|---|---|---|---|---|---|---|---|---|---|---|---|---|---|---|---|---|---|---|---|---|---|---|---|---|---|---|---|---|---|---|---|---|---|---|---|---|---|---|---|---|---|---|---|---|---|---|---|---|---|---|---|---|---|---|---|---|---|---|---|---|---|---|---|---|---|---|---|---|---|---|---|---|---|---|---|---|---|---|---|---|---|---|---|---|---|---|---|---|---|---|---|---|---|---|---|---|---|---|---|---|---|---|---|---|---|---|---|---|---|---|---|---|---|---|---|---|---|---|---|---|---|---|---|---|---|---|---|---|---|---|---|---|---|---|---|---|---|---|---|---|---|---|---|---|---|---|---|---|---|---|---|---|---|---|---|---|---|---|---|---|---|---|---|---|---|---|---|---|---|---|---|---|---|---|---|---|---|---|---|---|---|---|---|---|---|---|---|---|---|---|---|---|---|---|---|---|---|---|---|---|---|---|---|---|---|---|---|---|---|---|---|---|---|---|---|---|---|---|---|---|---|---|---|---|---|---|---|---|---|---|---|---|---|---|---|---|---|---|---|---|---|---|---|---|---|---|---|---|---|---|---|---|---|---|---|---|---|---|---|---|---|---|---|---|---|---|---|---|---|---|---|---|---|---|---|---|---|---|---|---|---|---|---|---|---|---|---|---|---|---|---|---|---|---|---|---|---|---|---|---|---|---|---|---|---|---|---|---|---|---|---|---|---|---|---|---|---|---|---|---|---|---|---|---|---|---|---|---|---|---|---|---|---|---|---|---|---|---|---|---|---|---|---|---|---|---|---|---|---|---|---|---|---|---|---|---|---|---|---|---|---|---|---|---|---|---|---|---|---|---|---|---|---|---|---|---|---|---|---|---|---|---|---|---|---|---|---|---|---|---|---|---|---|---|---|---|---|---|---|---|---|---|---|---|---|---|---|---|---|---|---|---|---|---|---|---|---|---|---|---|---|---|---|---|---|---|---|---|---|---|---|---|---|---|---|---|---|---|---|---|---|---|---|---|---|---|---|---|---|---|---|---|---|---|---|---|---|---|---|---|---|---|---|---|---|---|---|---|---|---|---|---|---|---|---|---|---|---|---|---|---|---|---|---|---|---|---|---|---|---|---|---|---|---|---|---|---|---|---|---|---|---|---|---|---|---|---|---|---|---|---|---|---|---|---|---|---|---|---|---|---|---|---|---|---|---|---|---|---|---|---|---|---|---|---|---|---|---|---|---|---|---|---|---|---|---|---|---|---|---|---|---|---|---|---|---|---|---|---|---|---|---|---|---|---|---|---|---|---|---|---|---|---|---|---|---|---|---|---|---|---|---|---|---|---|---|---|---|---|---|---|---|---|---|---|---|---|---|---|---|---|---|---|---|---|---|---|---|---|---|---|---|---|---|---|---|---|---|---|---|---|---|---|---|---|---|---|---|---|---|---|---|---|---|---|---|

|  |  |  |  |  |  |  |  |  |  |  |  |  |  |  |  |  |  |  |  |  |  |  |  |  |  |  |  |  |  |  |  |  |  |  |  |  |  |  |  |  |  |  |  |  |  |  |  |  |  |  |  |  |  |  |  |  |  |  |  |  |  |  |  |  |  |  |  |  |  |  |  |  |  |  |  |  |  |  |  |  |  |  |  |  |  |  |  |  |  |  |  |  |  |  |  |  |  |  |  |  |  |  |  |  |  |  |  |  |  |  |  |  |  |  |  |  |  |  |  |  |  |  |  |  |  |  |  |  |  |  |  |  |  |  |  |  |  |  |  |  |  |  |  |  |  |  |  |  |  |  |  |  |  |  |  |  |  |  |  |  |  |  |  |  |  |  |  |  |  |  |  |  |  |  |  |  |  |  |  |  |  |  |  |  |  |  |  |  |  |  |  |  |  |  |  |  |  |  |  |  |  |  |  |  |  |  |  |  |  |  |  |  |  |  |  |  |  |  |  |  |  |  |  |  |  |  |  |  |  |  |  |  |  |  |  |  |  |  |  |  |  |  |  |  |  |  |  |  |  |  |  |  |  |  |  |  |  |  |  |  |  |  |  |  |  |  |  |  |  |  |  |  |  |  |  |  |  |  |  |  |  |  |  |  |  |  |  |  |  |  |  |  |  |  |  |  |  |  |  |  |  |  |  |  |  |  |  |  |  |  |  |  |  |  |  |  |  |  |  |  |  |  |  |  |  |  |  |  |  |  |  |  |  |  |  |  |  |  |  |  |  |  |  |  |  |  |  |  |  |  |  |  |  |  |  |  |  |  |  |  |  |  |  |  |  |  |  |  |  |  |  |  |  |  |  |  |  |  |  |  |  |  |  |  |  |  |  |  |  |  |  |  |  |  |  |  |  |  |  |  |  |  |  |  |  |  |  |  |  |  |  |  |  |  |  |  |  |  |  |  |  |  |  |  |  |  |  |  |  |  |  |  |  |  |  |  |  |  |  |  |  |  |  |  |  |  |  |  |  |  |  |  |  |  |  |  |  |  |  |  |  |  |  |  |  |  |  |  |  |  |  |  |  |  |  |  |  |  |  |  |  |  |  |  |  |  |  |  |  |  |  |  |  |  |  |  |  |  |  |  |  |  |  |  |  |  |  |  |  |  |  |  |  |  |  |  |  |  |  |  |  |  |  |  |  |  |  |  |  |  |  |  |  |  |  |  |  |  |  |  |  |  |  |  |  |  |  |  |  |  |  |  |  |  |  |  |  |  |  |  |  |  |  |  |  |  |  |  |  |  |  |  |  |  |  |  |  |  |  |  |  |  |  |  |  |  |  |  |  |  |  |  |  |  |  |  |  |  |  |  |  |  |  |  |  |  |  |  |  |  |  |  |  |  |  |  |  |  |  |  |  |  |  |  |  |  |  |  |  |  |  |  |  |  |  |  |  |  |  |  |  |  |  |  |  |  |  |  |  |  |  |  |  |  |  |  |  |  |  |  |  |  |  |  |  |  |  |  |  |  |  |  |  |  |  |  |  |  |  |  |  |  |  |  |  |  |  |  |  |  |  |  |  |  |  |  |  |  |  |  |  |  |  |  |  |  |  |  |  |  |  |  |  |  |  |  |  |  |  |  |  |  |  |  |  |  |  |  |  |  |  |  |  |  |  |  |  |  |  |  |  |  |  |  |  |  |  |  |  |  |  |  |  |  |  |  |  |  |  |  |  |  |  |  |  |  |  |  |  |  |  |  |  |  |  |  |  |  |  |  |  |  |  |  |  |  |  |  |  |  |  |  |  |  |  |  |  |  |  |  |  |  |  |  |  |  |  |  |  |  |  |  |  |  |  |  |  |  |  |  |  |  |  |  |  |  |  |  |  |  |  |  |  |  |  |  |  |  |  |  |  |  |  |  |  |  |  |  |  |  |  |  |  |  |  |  |  |  |  |  |  |  |  |  |  |  |  |  |  |  |  |  |  |  |  |  |  |  |  |  |  |  |  |  |  |  |  |  |  |  |  |  |  |  |  |  |  |  |  |  |  |  |  |  |  |  |  |  |  |  |  |  |  |  |  |  |  |  |  |  |  |  |  |  |  |  |  |  |  |  |  |  |  |  |  |  |  |  |  |  |  |  |  |  |  |  |  |  |  |  |  |  |  |  |  |  |  |  |  |  |  |  |  |  |  |  |  |  |  |  |  |  |  |  |  |  |  |  |  |  |  |  |  |  |  |  |  |  |  |  |  |  |  |  |  |  |  |  |  |  |  |  |  |  |  |  |  |  |  |  |  |  |  |  |  |  |  |  |  |  |  |  |  |  |  |  |  |  |  |  |  |  |  |  |  |  |  |  |  |  |  |  |  |  |  |  |  |  |  |  |  |  |  |  |  |  |  |  |  |  |  |  |  |  |  |  |  |  |  |  |  |  |  |  |  |  |  |  |  |  |  |  |  |  |  |  |  |  |  |  |  |  |  |  |  |  |  |  |  |  |  |  |  |  |  |  |  |  |  |  |  |  |  |  |  |  |  |  |  |  |  |  |  |  |  |  |  |  |  |  |  |  |  |  |  |  |  |  |  |  |  |  |  |  |  |  |  |  |  |  |  |  |  |  |  |  |  |  |  |  |  |  |  |  |  |  |  |  |  |  |  |  |  |  |  |  |  |  |  |  |  |  |  |  |  |  |  |  |  |  |  |  |  |  |  |  |  |  |  |  |  |  |  |  |  |  |  |  |  |  |  |  |  |  |  |  |  |  |  |  |  |  |  |  |  |  |  |  |  |  |  |  |  |  |  |  |  |  |  |  |  |  |  |  |  |  |  |  |  |  |  |  |  |  |  |  |  |  |  |  |  |  |  |  |  |  |  |  |  |  |  |  |  |  |  |  |  |  |  |  |  |  |  |  |  |  |  |  |  |  |  |  |  |  |  |  |  |  |  |  |  |  |  |  |  |  |  |  |  |  |  |  |  |  |  |  |  |  |  |  |  |  |  |  |  |  |  |  |  |  |  |  |  |  |  |  |  |  |  |  |  |  |  |  |  |  |  |  |  |  |  |  |  |  |  |  |  |  |  |  |  |  |  |  |  |  |  |  |  |  |  |  |  |  |  |  |  |  |  |  |  |  |  |  |  |  |  |  |  |  |  |  |  |  |  |  |  |  |  |  |  |  |  |  |  |  |  |  |  |  |  |  |  |  |  |  |  |  |  |  |  |  |  |  |  |  |  |  |  |  |  |  |  |  |  |  |  |  |  |  |  |  |
|--|--|--|--|--|--|--|--|--|--|--|--|--|--|--|--|--|--|--|--|--|--|--|--|--|--|--|--|--|--|--|--|--|--|--|--|--|--|--|--|--|--|--|--|--|--|--|--|--|--|--|--|--|--|--|--|--|--|--|--|--|--|--|--|--|--|--|--|--|--|--|--|--|--|--|--|--|--|--|--|--|--|--|--|--|--|--|--|--|--|--|--|--|--|--|--|--|--|--|--|--|--|--|--|--|--|--|--|--|--|--|--|--|--|--|--|--|--|--|--|--|--|--|--|--|--|--|--|--|--|--|--|--|--|--|--|--|--|--|--|--|--|--|--|--|--|--|--|--|--|--|--|--|--|--|--|--|--|--|--|--|--|--|--|--|--|--|--|--|--|--|--|--|--|--|--|--|--|--|--|--|--|--|--|--|--|--|--|--|--|--|--|--|--|--|--|--|--|--|--|--|--|--|--|--|--|--|--|--|--|--|--|--|--|--|--|--|--|--|--|--|--|--|--|--|--|--|--|--|--|--|--|--|--|--|--|--|--|--|--|--|--|--|--|--|--|--|--|--|--|--|--|--|--|--|--|--|--|--|--|--|--|--|--|--|--|--|--|--|--|--|--|--|--|--|--|--|--|--|--|--|--|--|--|--|--|--|--|--|--|--|--|--|--|--|--|--|--|--|--|--|--|--|--|--|--|--|--|--|--|--|--|--|--|--|--|--|--|--|--|--|--|--|--|--|--|--|--|--|--|--|--|--|--|--|--|--|--|--|--|--|--|--|--|--|--|--|--|--|--|--|--|--|--|--|--|--|--|--|--|--|--|--|--|--|--|--|--|--|--|--|--|--|--|--|--|--|--|--|--|--|--|--|--|--|--|--|--|--|--|--|--|--|--|--|--|--|--|--|--|--|--|--|--|--|--|--|--|--|--|--|--|--|--|--|--|--|--|--|--|--|--|--|--|--|--|--|--|--|--|--|--|--|--|--|--|--|--|--|--|--|--|--|--|--|--|--|--|--|--|--|--|--|--|--|--|--|--|--|--|--|--|--|--|--|--|--|--|--|--|--|--|--|--|--|--|--|--|--|--|--|--|--|--|--|--|--|--|--|--|--|--|--|--|--|--|--|--|--|--|--|--|--|--|--|--|--|--|--|--|--|--|--|--|--|--|--|--|--|--|--|--|--|--|--|--|--|--|--|--|--|--|--|--|--|--|--|--|--|--|--|--|--|--|--|--|--|--|--|--|--|--|--|--|--|--|--|--|--|--|--|--|--|--|--|--|--|--|--|--|--|--|--|--|--|--|--|--|--|--|--|--|--|--|--|--|--|--|--|--|--|--|--|--|--|--|--|--|--|--|--|--|--|--|--|--|--|--|--|--|--|--|--|--|--|--|--|--|--|--|--|--|--|--|--|--|--|--|--|--|--|--|--|--|--|--|--|--|--|--|--|--|--|--|--|--|--|--|--|--|--|--|--|--|--|--|--|--|--|--|--|--|--|--|--|--|--|--|--|--|--|--|--|--|--|--|--|--|--|--|--|--|--|--|--|--|--|--|--|--|--|--|--|--|--|--|--|--|--|--|--|--|--|--|--|--|--|--|--|--|--|--|--|--|--|--|--|--|--|--|--|--|--|--|--|--|--|--|--|--|--|--|--|--|--|--|--|--|--|--|--|--|--|--|--|--|--|--|--|--|--|--|--|--|--|--|--|--|--|--|--|--|--|--|--|--|--|--|--|--|--|--|--|--|--|--|--|--|--|--|--|--|--|--|--|--|--|--|--|--|--|--|--|--|--|--|--|--|--|--|--|--|--|--|--|--|--|--|--|--|--|--|--|--|--|--|--|--|--|--|--|--|--|--|--|--|--|--|--|--|--|--|--|--|--|--|--|--|--|--|--|--|--|--|--|--|--|--|--|--|--|--|--|--|--|--|--|--|--|--|--|--|--|--|--|--|--|--|--|--|--|--|--|--|--|--|--|--|--|--|--|--|--|--|--|--|--|--|--|--|--|--|--|--|--|--|--|--|--|--|--|--|--|--|--|--|--|--|--|--|--|--|--|--|--|--|--|--|--|--|--|--|--|--|--|--|--|--|--|--|--|--|--|--|--|--|--|--|--|--|--|--|--|--|--|--|--|--|--|--|--|--|--|--|--|--|--|--|--|--|--|--|--|--|--|--|--|--|--|--|--|--|--|--|--|--|--|--|--|--|--|--|--|--|--|--|--|--|--|--|--|--|--|--|--|--|--|--|--|--|--|--|--|--|--|--|--|--|--|--|--|--|--|--|--|--|--|--|--|--|--|--|--|--|--|--|--|--|--|--|--|--|--|--|--|--|--|--|--|--|--|--|--|--|--|--|--|--|--|--|--|--|--|--|--|--|--|--|--|--|--|--|--|--|--|--|--|--|--|--|--|--|--|--|--|--|--|--|--|--|--|--|--|--|--|--|--|--|--|--|--|--|--|--|--|--|--|--|--|--|--|--|--|--|--|--|--|--|--|--|--|--|--|--|--|--|--|--|--|--|--|--|--|--|--|--|--|--|--|--|--|--|--|--|--|--|--|--|--|--|--|--|--|--|--|--|--|--|--|--|--|--|--|--|--|--|--|--|--|--|--|--|--|--|--|--|--|--|--|--|--|--|--|--|--|--|--|--|--|--|--|--|--|--|--|--|--|--|--|--|--|--|--|--|--|--|--|--|--|--|--|--|--|--|--|--|--|--|--|--|--|--|--|--|--|--|--|--|--|--|--|--|--|--|--|--|--|--|--|--|--|--|--|--|--|--|--|--|--|--|--|--|--|--|--|--|--|--|--|--|--|--|--|--|--|--|--|--|--|--|--|--|--|--|--|--|--|--|--|--|--|--|--|--|--|--|--|--|--|--|--|--|--|--|--|--|--|--|--|--|--|--|--|--|--|--|--|--|--|--|--|--|--|--|--|--|--|--|--|--|--|--|--|--|--|--|--|--|--|--|--|--|--|--|--|--|--|--|--|--|--|--|--|--|--|--|--|--|--|--|--|--|--|--|--|--|--|--|--|--|--|--|--|--|--|--|--|--|--|--|--|--|--|--|--|--|--|--|--|--|--|--|--|--|--|--|--|--|--|--|--|--|--|--|--|--|--|--|--|--|--|--|--|--|--|--|--|--|--|--|--|--|--|--|--|--|--|--|--|--|--|--|--|--|--|--|--|--|--|--|--|--|--|--|--|--|--|--|--|--|--|--|--|--|--|--|--|--|--|--|--|--|--|
|  |  |  |  |  |  |  |  |  |  |  |  |  |  |  |  |  |  |  |  |  |  |  |  |  |  |  |  |  |  |  |  |  |  |  |  |  |  |  |  |  |  |  |  |  |  |  |  |  |  |  |  |  |  |  |  |  |  |  |  |  |  |  |  |  |  |  |  |  |  |  |  |  |  |  |  |  |  |  |  |  |  |  |  |  |  |  |  |  |  |  |  |  |  |  |  |  |  |  |  |  |  |  |  |  |  |  |  |  |  |  |  |  |  |  |  |  |  |  |  |  |  |  |  |  |  |  |  |  |  |  |  |  |  |  |  |  |  |  |  |  |  |  |  |  |  |  |  |  |  |  |  |  |  |  |  |  |  |  |  |  |  |  |  |  |  |  |  |  |  |  |  |  |  |  |  |  |  |  |  |  |  |  |  |  |  |  |  |  |  |  |  |  |  |  |  |  |  |  |  |  |  |  |  |  |  |  |  |  |  |  |  |  |  |  |  |  |  |  |  |  |  |  |  |  |  |  |  |  |  |  |  |  |  |  |  |  |  |  |  |  |  |  |  |  |  |  |  |  |  |  |  |  |  |  |  |  |  |  |  |  |  |  |  |  |  |  |  |  |  |  |  |  |  |  |  |  |  |  |  |  |  |  |  |  |  |  |  |  |  |  |  |  |  |  |  |  |  |  |  |  |  |  |  |  |  |  |  |  |  |  |  |  |  |  |  |  |  |  |  |  |  |  |  |  |  |  |  |  |  |  |  |  |  |  |  |  |  |  |  |  |  |  |  |  |  |  |  |  |  |  |  |  |  |  |  |  |  |  |  |  |  |  |  |  |  |  |  |  |  |  |  |  |  |  |  |  |  |  |  |  |  |  |  |  |  |  |  |  |  |  |  |  |  |  |  |  |  |  |  |  |  |  |  |  |  |  |  |  |  |  |  |  |  |  |  |  |  |  |  |  |  |  |  |  |  |  |  |  |  |  |  |  |  |  |  |  |  |  |  |  |  |  |  |  |  |  |  |  |  |  |  |  |  |  |  |  |  |  |  |  |  |  |  |  |  |  |  |  |  |  |  |  |  |  |  |  |  |  |  |  |  |  |  |  |  |  |  |  |  |  |  |  |  |  |  |  |  |  |  |  |  |  |  |  |  |  |  |  |  |  |  |  |  |  |  |  |  |  |  |  |  |  |  |  |  |  |  |  |  |  |  |  |  |  |  |  |  |  |  |  |  |  |  |  |  |  |  |  |  |  |  |  |  |  |  |  |  |  |  |  |  |  |  |  |  |  |  |  |  |  |  |  |  |  |  |  |  |  |  |  |  |  |  |  |  |  |  |  |  |  |  |  |  |  |  |  |  |  |  |  |  |  |  |  |  |  |  |  |  |  |  |  |  |  |  |  |  |  |  |  |  |  |  |  |  |  |  |  |  |  |  |  |  |  |  |  |  |  |  |  |  |  |  |  |  |  |  |  |  |  |  |  |  |  |  |  |  |  |  |  |  |  |  |  |  |  |  |  |  |  |  |  |  |  |  |  |  |  |  |  |  |  |  |  |  |  |  |  |  |  |  |  |  |  |  |  |  |  |  |  |  |  |  |  |  |  |  |  |  |  |  |  |  |  |  |  |  |  |  |  |  |  |  |  |  |  |  |  |  |  |  |  |  |  |  |  |  |  |  |  |  |  |  |  |  |  |  |  |  |  |  |  |  |  |  |  |  |  |  |  |  |  |  |  |  |  |  |  |  |  |  |  |  |  |  |  |  |  |  |  |  |  |  |  |  |  |  |  |  |  |  |  |  |  |  |  |  |  |  |  |  |  |  |  |  |  |  |  |  |  |  |  |  |  |  |  |  |  |  |  |  |  |  |  |  |  |  |  |  |  |  |  |  |  |  |  |  |  |  |  |  |  |  |  |  |  |  |  |  |  |  |  |  |  |  |  |  |  |  |  |  |  |  |  |  |  |  |  |  |  |  |  |  |  |  |  |  |  |  |  |  |  |  |  |  |  |  |  |  |  |  |  |  |  |  |  |  |  |  |  |  |  |  |  |  |  |  |  |  |  |  |  |  |  |  |  |  |  |  |  |  |  |  |  |  |  |  |  |  |  |  |  |  |  |  |  |  |  |  |  |  |  |  |  |  |  |  |  |  |  |  |  |  |  |  |  |  |  |  |  |  |  |  |  |  |  |  |  |  |  |  |  |  |  |  |  |  |  |  |  |  |  |  |  |  |  |  |  |  |  |  |  |  |  |  |  |  |  |  |  |  |  |  |  |  |  |  |  |  |  |  |  |  |  |  |  |  |  |  |  |  |  |  |  |  |  |  |  |  |  |  |  |  |  |  |  |  |  |  |  |  |  |  |  |  |  |  |  |  |  |  |  |  |  |  |  |  |  |  |  |  |  |  |  |  |  |  |  |  |  |  |  |  |  |  |  |  |  |  |  |  |  |  |  |  |  |  |  |  |  |  |  |  |  |  |  |  |  |  |  |  |  |  |  |  |  |  |  |  |  |  |  |  |  |  |  |  |  |  |  |  |  |  |  |  |  |  |  |  |  |  |  |  |  |  |  |  |  |  |  |  |  |  |  |  |  |  |  |  |  |  |  |  |  |  |  |  |  |  |  |  |  |  |  |  |  |  |  |  |  |  |  |  |  |  |  |  |  |  |  |  |  |  |  |  |  |  |  |  |  |  |  |  |  |  |  |  |  |  |  |  |  |  |  |  |  |  |  |  |  |  |  |  |  |  |  |  |  |  |  |  |  |  |  |  |  |  |  |  |  |  |  |  |  |  |  |  |  |  |  |  |  |  |  |  |  |  |  |  |  |  |  |  |  |  |  |  |  |  |  |  |  |  |  |  |  |  |  |  |  |  |  |  |  |  |  |  |  |  |  |  |  |  |  |  |  |  |  |  |  |  |  |  |  |  |  |  |  |  |  |  |  |  |  |  |  |  |  |  |  |  |  |  |  |  |  |  |  |  |  |  |  |  |  |  |  |  |  |  |  |  |  |  |  |  |  |  |  |  |  |  |  |  |  |  |  |  |  |  |  |  |  |  |  |  |  |  |  |  |  |  |  |  |  |  |  |  |  |  |  |  |  |  |  |  |  |  |  |  |  |  |  |  |  |  |  |  |  |  |  |  |  |  |  |  |  |  |  |  |  |  |  |  |  |  |  |  |  |  |  |  |  |  |  |  |  |  |  |  |  |  |  |  |  |  |  |  |  |  |  |  |  |  |  |  |  |  |  |  |  |  |  |
|--|--|--|--|--|--|--|--|--|--|--|--|--|--|--|--|--|--|--|--|--|--|--|--|--|--|--|--|--|--|--|--|--|--|--|--|--|--|--|--|--|--|--|--|--|--|--|--|--|--|--|--|--|--|--|--|--|--|--|--|--|--|--|--|--|--|--|--|--|--|--|--|--|--|--|--|--|--|--|--|--|--|--|--|--|--|--|--|--|--|--|--|--|--|--|--|--|--|--|--|--|--|--|--|--|--|--|--|--|--|--|--|--|--|--|--|--|--|--|--|--|--|--|--|--|--|--|--|--|--|--|--|--|--|--|--|--|--|--|--|--|--|--|--|--|--|--|--|--|--|--|--|--|--|--|--|--|--|--|--|--|--|--|--|--|--|--|--|--|--|--|--|--|--|--|--|--|--|--|--|--|--|--|--|--|--|--|--|--|--|--|--|--|--|--|--|--|--|--|--|--|--|--|--|--|--|--|--|--|--|--|--|--|--|--|--|--|--|--|--|--|--|--|--|--|--|--|--|--|--|--|--|--|--|--|--|--|--|--|--|--|--|--|--|--|--|--|--|--|--|--|--|--|--|--|--|--|--|--|--|--|--|--|--|--|--|--|--|--|--|--|--|--|--|--|--|--|--|--|--|--|--|--|--|--|--|--|--|--|--|--|--|--|--|--|--|--|--|--|--|--|--|--|--|--|--|--|--|--|--|--|--|--|--|--|--|--|--|--|--|--|--|--|--|--|--|--|--|--|--|--|--|--|--|--|--|--|--|--|--|--|--|--|--|--|--|--|--|--|--|--|--|--|--|--|--|--|--|--|--|--|--|--|--|--|--|--|--|--|--|--|--|--|--|--|--|--|--|--|--|--|--|--|--|--|--|--|--|--|--|--|--|--|--|--|--|--|--|--|--|--|--|--|--|--|--|--|--|--|--|--|--|--|--|--|--|--|--|--|--|--|--|--|--|--|--|--|--|--|--|--|--|--|--|--|--|--|--|--|--|--|--|--|--|--|--|--|--|--|--|--|--|--|--|--|--|--|--|--|--|--|--|--|--|--|--|--|--|--|--|--|--|--|--|--|--|--|--|--|--|--|--|--|--|--|--|--|--|--|--|--|--|--|--|--|--|--|--|--|--|--|--|--|--|--|--|--|--|--|--|--|--|--|--|--|--|--|--|--|--|--|--|--|--|--|--|--|--|--|--|--|--|--|--|--|--|--|--|--|--|--|--|--|--|--|--|--|--|--|--|--|--|--|--|--|--|--|--|--|--|--|--|--|--|--|--|--|--|--|--|--|--|--|--|--|--|--|--|--|--|--|--|--|--|--|--|--|--|--|--|--|--|--|--|--|--|--|--|--|--|--|--|--|--|--|--|--|--|--|--|--|--|--|--|--|--|--|--|--|--|--|--|--|--|--|--|--|--|--|--|--|--|--|--|--|--|--|--|--|--|--|--|--|--|--|--|--|--|--|--|--|--|--|--|--|--|--|--|--|--|--|--|--|--|--|--|--|--|--|--|--|--|--|--|--|--|--|--|--|--|--|--|--|--|--|--|--|--|--|--|--|--|--|--|--|--|--|--|--|--|--|--|--|--|--|--|--|--|--|--|--|--|--|--|--|--|--|--|--|--|--|--|--|--|--|--|--|--|--|--|--|--|--|--|--|--|--|--|--|--|--|--|--|--|--|--|--|--|--|--|--|--|--|--|--|--|--|--|--|--|--|--|--|--|--|--|--|--|--|--|--|--|--|--|--|--|--|--|--|--|--|--|--|--|--|--|--|--|--|--|--|--|--|--|--|--|--|--|--|--|--|--|--|--|--|--|--|--|--|--|--|--|--|--|--|--|--|--|--|--|--|--|--|--|--|--|--|--|--|--|--|--|--|--|--|--|--|--|--|--|--|--|--|--|--|--|--|--|--|--|--|--|--|--|--|--|--|--|--|--|--|--|--|--|--|--|--|--|--|--|--|--|--|--|--|--|--|--|--|--|--|--|--|--|--|--|--|--|--|--|--|--|--|--|--|--|--|--|--|--|--|--|--|--|--|--|--|--|--|--|--|--|--|--|--|--|--|--|--|--|--|--|--|--|--|--|--|--|--|--|--|--|--|--|--|--|--|--|--|--|--|--|--|--|--|--|--|--|--|--|--|--|--|--|--|--|--|--|--|--|--|--|--|--|--|--|--|--|--|--|--|--|--|--|--|--|--|--|--|--|--|--|--|--|--|--|--|--|--|--|--|--|--|--|--|--|--|--|--|--|--|--|--|--|--|--|--|--|--|--|--|--|--|--|--|--|--|--|--|--|--|--|--|--|--|--|--|--|--|--|--|--|--|--|--|--|--|--|--|--|--|--|--|--|--|--|--|--|--|--|--|--|--|--|--|--|--|--|--|--|--|--|--|--|--|--|--|--|--|--|--|--|--|--|--|--|--|--|--|--|--|--|--|--|--|--|--|--|--|--|--|--|--|--|--|--|--|--|--|--|--|--|--|--|--|--|--|--|--|--|--|--|--|--|--|--|--|--|--|--|--|--|--|--|--|--|--|--|--|--|--|--|--|--|--|--|--|--|--|--|--|--|--|--|--|--|--|--|--|--|--|--|--|--|--|--|--|--|--|--|--|--|--|--|--|--|--|--|--|--|--|--|--|--|--|--|--|--|--|--|--|--|--|--|--|--|--|--|--|--|--|--|--|--|--|--|--|--|--|--|--|--|--|--|--|--|--|--|--|--|--|--|--|--|--|--|--|--|--|--|--|--|--|--|--|--|--|--|--|--|--|--|--|--|--|--|--|--|--|--|--|--|--|--|--|--|--|--|--|--|--|--|--|--|--|--|--|--|--|--|--|--|--|--|--|--|--|--|--|--|--|--|--|--|--|--|--|--|--|--|--|--|--|--|--|--|--|--|--|--|--|--|--|--|--|--|--|--|--|--|--|--|--|--|--|--|--|--|--|--|--|--|--|--|--|--|--|--|--|--|--|--|--|--|--|--|--|--|--|--|--|--|--|--|--|--|--|--|--|--|--|--|--|--|--|--|--|--|--|--|--|--|--|--|--|--|--|--|--|--|--|--|--|--|--|--|--|--|--|--|--|--|--|--|--|--|--|--|--|--|--|--|--|--|--|--|--|--|--|--|--|--|--|--|--|--|--|--|--|--|--|--|--|--|--|--|--|--|--|--|--|--|--|--|--|--|--|--|--|--|--|--|--|--|--|--|--|--|--|--|--|--|--|--|--|--|--|--|--|--|--|--|--|











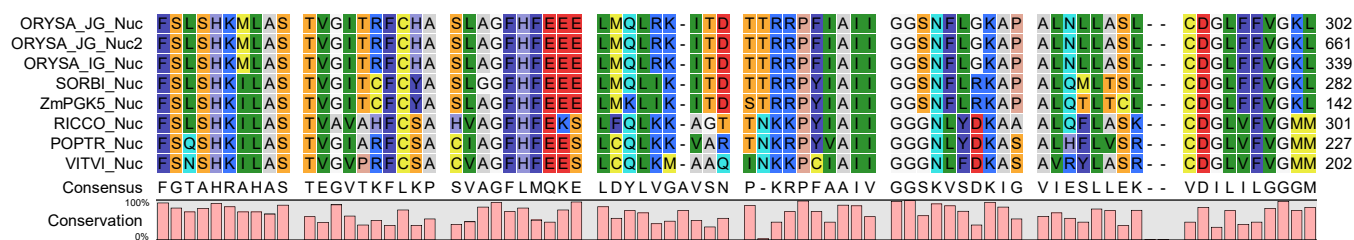

|               | 820                 | 840               | 860                 | 880                   |                     |                     |                     |             |     |
|---------------|---------------------|-------------------|---------------------|-----------------------|---------------------|---------------------|---------------------|-------------|-----|
| POPNI_Cyt     | I F T F Y K A Q G - | Y S V G - - S S   | - - L V E E D K L D | L A T S L I E K A R   | V K G V K L L L P T | D V V V A D K F A S | D A N S K V V P A S | E - - - - - | 290 |
| POPTR_Cyt2    | I F T F Y K A Q G - | Y S V G - - S S   | - - L V E E D K L D | L A T S L I E K A K   | V K G V K L L L P T | D V V V A D K F A P | D A N S K V V P A S | E - - - - - | 290 |
| POPTR_Cyt1    | I Y T F Y K A Q G - | H S V G - - S S   | - - L V E E D K L D | L A T S L I E K A K   | V K G V K L L L P A | D V L V A D K F A P | D A N S K V V P A S | E - - - - - | 290 |
| RICCO_Cyt     | I F T F Y K A Q G - | H S V G - - S S   | - - L V E G D K L D | L A S S L I E K A K   | A K G V D L L L P T | D V V I A D K F A A | D A N S K V V P A S | S - - - - - | 290 |
| GOSHI_Cyt     | I Y T F Y K A Q G - | H A V G - - S S   | - - L V E E D K L D | L A T S L I E K A K   | A K G V S L L L P S | D V V V A D K F A A | D A N S K V V P A S | G - - - - - | 290 |
| VITVI_Cyt     | I F T F Y K A Q G - | Y G V G - - S S   | - - L V E E D K L D | L A T S L I E K A K   | S K G V S L L L P A | D V V I A D K F A A | D A N S K V V P A S | C - - - - - | 290 |
| SOLTU_Cyt     | I F T F Y K A Q G - | Y A V G - - S S   | - - L V K E D K L D | L A T S L M E K A K   | T K G V S L L L P T | D V V I A D K F A A | D A N S K V V P A S | E - - - - - | 291 |
| NICTA_Cyt     | I F T F Y K A Q G - | Y A V G - - S S   | - - L V E E D K L D | L A T S L M E K A K   | A K G V S L L L P T | D V V I A D K F A A | D A N S K V V P A S | E - - - - - | 290 |
| HELAN_Cyt     | I F T F Y K A Q G - | L A V G - - S S   | - - L V E E D K L D | L A T T L I E K A K   | S K G V S L L L P S | D V V I A D K F A A | D A N S K V V P A S | S - - - - - | 290 |
| ARATH_Cyt     | I F T F Y K A Q G - | L S V G - - S S   | - - L V E E D K L D | L A K S L M E K A K   | A K G V S L L L P T | D V V I A D K F A P | D A N S K V P A T   | A - - - - - | 290 |
| PISSA_Cyt     | V F T F Y K A Q G - | Y S V G - - T S   | - - L V E E D K L G | L A T S L I E K A K   | A K G V S L L L P T | D V V I A D K F S A | D A N D K V P A S   | S - - - - - | 290 |
| SORBI_Cyt1    | I Y T F Y K A Q G - | Y S V G - - K S   | - - L V E E D K L E | L A T S L I E K A K   | A K G V S L L L P T | D V V V A D K F A A | D A E S K V P A T   | A - - - - - | 290 |
| ZmPGK3_Cyt    | I Y T F Y K A Q G - | Y S V G - - K S   | - - L V E E D K L E | L A T S L I E K A K   | A K G V S L L L P T | D V V V A D K F A A | D A E S K V P A T   | A - - - - - | 290 |
| ORYSA_IG_Cyt  | I F T F Y K A Q G - | Y A V G - - K S   | - - L V E E D K L E | L A T S L I E K A K   | A K G V S L L L P T | D V V V A D K F A A | D A E S K T V A A S | A - - - - - | 290 |
| ORYSA_IG_Cyt  | I F T F Y K A Q G - | Y A V G - - K S   | - - L V E E D K L E | L A T S L I E K A K   | A K G V S L L L P T | D V V V A D K F A A | D A E S K T V A A S | A - - - - - | 290 |
| SORBI_Cyt2    | I F T F Y K A Q G - | Y A V G - - K S   | - - L V E E D K L E | L A T S L I E K A K   | S K G V S L L L P T | D V V V A D K F A A | D A D S K T V P A S | S - - - - - | 290 |
| ORYSA_IG_Cyt2 | I Y T F Y K A Q G - | Y A V G - - K S   | - - L V E E D K L E | L A T S L I E K A K   | S K G V S L L L P T | D V V V A D K F A A | D A E S K T V P A S | A - - - - - | 290 |
| TRIAE_Cyt     | I F T F Y K A Q G - | L A V G - - K S   | - - L V E E D K L E | L A T S L I E T A K   | S K G V K L L L P T | D V V V A D K F A A | D A E S K V P A T   | A - - - - - | 290 |
| POPNI_Chl     | I F T F Y K A Q G - | L A V G - - S S   | - - L V E E D K L D | L A T T L L E K A K   | A K G V S L L L P S | D V V I A D K F A P | D A N S K T V P A S | A - - - - - | 365 |
| POPTR_Chl2    | I F T F Y K A Q G - | L A V G - - S S   | - - L V E E D K L D | L A T T L L E K A K   | A K G V S L L L P S | D V V I A D K F A P | D A N S K T V P A S | A - - - - - | 365 |
| POPTR_Chl1    | I F T F Y K A Q G - | L P V G - - S S   | - - L V E E D K L G | L A T S L L E K A K   | A K G V S L L L P S | D V V I A D K F A P | D A N S K V P A S   | A - - - - - | 365 |
| RICCO_Chl     | I F T F Y K A Q G - | L S V G - - S S   | - - L V E E D K L D | L A T S L L A K A K   | L K G V S L L L P T | D V V I A D K F A P | D A N S K V V A A S | A - - - - - | 363 |
| NICTA_Chl     | I F T F Y K A Q G - | L S V G - - S S   | - - L V E E D K L E | L A T S L L E K A K   | A K G V S L L L P S | D V V I A D K F A P | D A N S K V P A S   | A - - - - - | 364 |
| NICBE_Chl     | I F T F Y K A Q G - | L S V G - - S S   | - - L V E E D K L E | L A T S L L E K A K   | A K G V S L L L P S | D V V I A D K F A P | D A N S K V P A S   | A - - - - - | 364 |
| SOLTU_Chl     | I F T F Y K A Q G - | L S V G - - S S   | - - L V E E D K L E | L A T S L L E K A K   | A K G V S L L L P S | D V V I A D K F A P | D A N S K V P A S   | A - - - - - | 365 |
| MUSAC_Chl     | I F T F Y K A Q G - | L P V G - - S S   | - - L V E E D K L E | L A T S L L A K A K   | A K G V S L L L P T | D V V I A D K F A P | D A N S K V P A S   | E - - - - - | 363 |
| VITVI_Chl1    | I F T F Y K A Q G - | L S V G - - S S   | - - L V E E D K L S | L A T S L L E K A K   | A K G V S L L L P T | D V V I A D K F A P | D A N S K - - - -   | - - - - -   | 323 |
| VITVI_Chl2    | I F T F Y K A Q G - | L S V G - - S S   | - - L V E E D K L S | L A T S L L E K A K   | A K G V S L L L P T | D V V I A D K F A P | D A N S K V P A S   | A - - - - - | 362 |
| ARATH_Chl2    | I F T F Y K A Q G - | L S V G - - S S   | - - L V E E D K L E | L A T E L L A K A K   | A K G V S L L L P T | D V V V A D K F A P | D A N S K V P A S   | G - - - - - | 365 |
| ARATH_Chl1    | I F T F Y K A Q G - | L S V G - - S S   | - - L V E E D K L E | L A T E L L A K A K   | A K G V S L L L P T | D V V V A D K F A P | D A N S K V P A S   | G - - - - - | 362 |
| SORBI_Chl     | I F T F Y K A Q G - | L S V G - - A S   | - - L V E E D K L D | L A T S L L A K A K   | E K G V S L L L P T | D V V I A D K F A P | D A N S Q V P A S   | A - - - - - | 367 |
| ZmPGK1_Chl    | I F T F Y K A Q G - | L P V G - - A S   | - - L V E E D K L E | L A T S L L A K A K   | E K G V S L M L P T | D V V I A D K F A P | D A N S Q V P A S   | A - - - - - | 364 |
| ZmPGK2_Chl    | I F T F Y K A Q G - | L S V G - - A S   | - - L V E E D K L D | L A T S L L A K A K   | E K G V S L M L P T | D V V I A D K F A P | D A N S Q V P A S   | A - - - - - | 361 |
| TRIAE_Chl     | I F T F Y K A Q G - | L S V G - - S S   | - - L V E E D K L E | L A T S L L A K A K   | A K G V S L L L P S | D V V I A D K F A P | D A N S Q V P A S   | A - - - - - | 361 |
| SPIOL_Chl     | I F T F Y K A Q G - | M S V G - - S S   | - - L V E E D K L D | L A T S L L A K A K   | E K G V S L L L P T | D V V I A D K F A A | D A D S K V P A S   | G - - - - - | 317 |
| MUSAC_Cyt     | I F T F Y K A Q G - | Y S V G - - S S   | - - L V E E D K L N | L A T S L L E K A K   | S K G V S L L L P T | D V V V A D K F A A | D A E S K V P A S   | G - - - - - | 290 |
| ORYSA_IG_Chl  | I F T F Y K A Q G - | L P V G - - A S   | - - L V E E D K L E | L A T S L L A K A K   | E K G V S L M L P T | D V I V A D K F A P | E A N C Q V V S A Y | A - - - - - | 338 |
| ORYSA_IG_Chl2 | I F T F Y K A Q G - | L P V G - - A S   | - - L V E E D K L E | L A T S L L A K A K   | E K G V S L M L P T | D V I V A D K F A P | E A N C Q - - - -   | - - - - -   | 365 |
| ORYSA_IG_Chl3 | I F T F Y K A Q G - | L P V G - - A S   | - - L V E E D K L E | L A T S L L A K A K   | E K G V S L M L P T | D V I V A D K F A P | E A N C Q - - - -   | - - - - -   | 321 |
| PICSI_Chl     | - - - - -           | - - - - - S       | - - L V E E D K L E | L A S T L M K K A K   | E K G V S L L L P T | D V V I A D K F A A | D A N S K V V P A S | D - - - - - | 356 |
| CHABR         | I F T F Y K A Q G - | L K V G - - S S   | - - L V E E D K L E | L A K T L M A Q A K   | E K G V E L M L P S | D V V V A D K F S P | D A N S Q V I A A D | A - - - - - | 404 |
| CHLRE_Chl     | I F T F Y K A R A - | L K V G - - S S   | - - L V E E D K L E | L A K K L E M A K     | A K G V Q L L L P T | D V V V A D K F D A | D A N T Q T V P I T | A - - - - - | 350 |
| VOLCA_Chl     | I F T F Y K A R G - | L K V G - - S S   | - - L V E E D K L E | L A K N L E A K A K   | A K G V Q L L L P S | D V V V A D K F D A | D A N T Q T V S V E | A - - - - - | 351 |
| ZmPGK4_Chl    | I F T F Y K A Q G - | H S I G - - S S   | - - L V E E D K L E | L A T S L L R K A K   | E K G V S L M L P F | D L V V A D K F A P | D A S S Q V V P A S | A - - - - - | 260 |
| MICSP_Chl     | I F T F Y K A L G - | L D V G - - S S   | - - L V E D D K I D | L A K E L M A K A E   | E K G V K L L L P T | D V V V A D A F A A | D A K T Q T V S V D | A - - - - - | 329 |
| SYNSP         | I F T F Y K A R G - | L A V G - - K S   | - - L V E E D K L E | L A K E L E A K A K   | A K G V E L L L P T | D V L L A D N F A P | D A N S Q V A D V T | A - - - - - | 290 |
| ORYSA_IG_Chl1 | - - - - -           | - - - - -         | - - - - -           | - - - - -             | - - - - -           | - - - - -           | - - - - -           | - - - - -   | 309 |
| BACME         | S Y T F L K A L G - | H E V G - - K S   | - - L L E E D K L E | L A K S F M E K A K   | K N G V N F Y M P V | D V V V A D D F S N | D A N I Q V V S I E | D - - - - - | 285 |
| BACST         | A Y T F V K A L G - | H D V G - - S S   | - - L L E E D K L E | L A K S F M E K A K   | E K G V R F Y M P V | D V V V A D R F A N | D A N T K V V P I D | A - - - - - | 285 |
| THEMA         | M Y T F L K A L G - | K E V G - - S S   | - - R V E E D K I D | L A K E L V E K A K   | E K G V E I V L P V | D A V I A Q K I E P | G V E K K V R I D   | D G - - - - | 285 |
| THEAQ         | A F T F L K A L G - | G E V G - - S S   | - - L V E E D R L D | L A K D L L G R A E   | A L G V R V V L P E | D V V A A E R I E A | G V E T R V F P A R | A - - - - - | 282 |
| ASPN1         | A F T F K K T L E N | V K - I G - - S S | - - L F D E A G S K | I V G N I L E K A K   | K H N V K V V L P V | D V V T A D K F A A | D A K T G Y A T D E | Q G - - - - | 308 |
| PENCI         | A F T F K K T L E N | V K - I G - - S S | - - L F D E A G S K | I V G E I V E K A K   | K Y N V E I V L P V | D V V T A D K F S A | D A T V G A A T D A | T G - - - - | 306 |
| YARLI         | A F T F K K T L E N | V K - I G - - S S | - - L F D E D G S K | I V A G L V E K A K   | K N N V K L V P V   | D V V T A D K F S K | D A K V G H A T D A | E G - - - - | 305 |
| TRIIE         | A F T F K K V L N N | I P - I G - - T S | - - L F D E A G A K | T Y P Q L V E K A K   | A K N V K L V L P T | D V I T A D K F D K | D A N T G Y A T D E | S G - - - - | 306 |
| TRIVI         | A F T F K K V L D N | L A - I G - - D S | - - L F D K A G A E | T Y P K L V E K A K   | A K N V K L V L P T | D F I T A D K F D K | D A N T G Y A T D K | D G - - - - | 312 |
| NEUCR         | A F T F K K T L Q N | M P - I G - - S S | - - L F D E A G A K | I V P D L V K K A E   | K N N V K L V L P V | D F T I A D K F D K | D A N T G Y A T D K | D G - - - - | 306 |
| CANMA         | A F T F K K V L N N | M P - I G - - S S | - - L F D E A G A K | N V E N L V A K A K   | K N N V E I L P V   | D F V T A D K F D K | D A E V S T A D D V | T G - - - - | 305 |
| KLULA         | A F T F K K V L E N | T E - I G - - D S | - - L Y D A A G A E | L V P K L V E K A K   | K N N V K L V L P T | D F V I G D K F S A | D A N T K V V T D K | E G - - - - | 304 |
| SACCE         | A F T F K K V L E N | T E - I G - - S S | - - L F D K A G A E | I V P K L M E K A K   | A K G V E V V L P V | D F I I A D A F S A | D A N T K T V T D K | E G - - - - | 304 |
| RHINI_PGK1    | A F T F K K T L D N | V K - I G - - S S | - - L F D E P G S K | L V Q N L V K K A A   | E K N V K L V P V   | D F I T A D K F A P | D A S T G Y A T D D | D G - - - - | 304 |
| RHINI_PGK2    | A F T F K K T L D N | V K Q I G - - S S | - - L F D E A G S K | L V R N L V K K A A   | E K N V K L V P V   | D F V T A D K F A P | D A N T G Y A T D A | D G - - - - | 305 |
| HOMSA_PGK1    | A F T F L K V L N N | M E - I G - - T S | - - L F D E E G A K | I V K D L M S K A E   | K N G V K I T L P V | D F V T A D K F D E | D A K T G Q A T V A | S G - - - - | 306 |
| MUSMU_PGK1    | A F T F L K V L N N | M E - I G - - T S | - - L Y D E E G A K | I V K D L M S K A E   | K N G V K I T L P V | D F V T A D K F D E | D A K T G Q A T V A | S G - - - - | 306 |
| GALGA         | A F T F L K V L N N | M Q - I G - - S S | - - L F D E E G S K | I V K D L M A K A E   | K N G V K I T L P V | D F I T A D K F D E | H A Q T G E A T V A | S G - - - - | 306 |
| HOMSA_PGK2    | A Y T F L K V L N N | M E - I G - - A S | - - L F D E E G A K | I V K D I M A K A Q   | K N G V R I T F P V | D F V T G D K F D E | N A Q V G K A T V A | S G - - - - | 306 |
| MUSMU_PGK2    | A Y T F L K E L K N | M Q - I G - - A S | - - L F D E E G A T | I V K E I M E K A K   | K N G V K I V P V   | D F V T G D K F D E | N A K V G Q A T V A | S G - - - - | 306 |
| SCHMA         | A Y T F L K Q I H N | M H - I G - - S S | - - L F D A P G A E | I V H K V I M E T A K | A K N V A I H L P V | D F V T A D K F A D | D A N T E I R T I Q | S G - - - - | 304 |
| DROME         | A F T F L K V L N N | M K - I G - - S S | - - L F D E E G S K | I V E K L V E K A K   | K N N V Q L H L P V | D F V C G D K F A E | N A A V S E A T V E | A G - - - - | 304 |
| PLAFA         | A F T F K K V L N N | M K - I G - - S S | - - L F D E A G S K | I V G E I M E K A K   | A K N V Q I H L P V | D F K I A D N F D N | N A N T K F V T D E | E G - - - - | 305 |
| TETTH         | A F T F L K K I H N | T E - I G - - T S | - - L F D E E G Y K | I V D Q L L E K A K   | A K N V K I H L P V | D F L C G D S L E A | N A N T R S F D L E | S G - - - - | 306 |
| TRYBR_Gly     | A Y T F L K A Q G - | Y S I G - - K S   | - - K C E E S K L E | F A R S L L K K A E   | D R K V Q I L L P I | D H V C H T E F K A | - V D S P L I T E D | Q N - - - - | 396 |
| TRYCO_Gly     | A Y T F L K A Q G - | H R I G - - T S   | - - M C E E D R L D | L A R S L L K K A E   | D R K V Q V L L P V | D H V C H T E F K A | - V D T P V V T A D | A D - - - - | 396 |
| TRYCO_Cyt     | A Y T F L K A Q G - | H R I G - - T S   | - - M C E E D R L D | L A R S L L K K A E   | D R K V Q V L L P V | D H V C H T E F K A | - V D T P V V T A D | A D - - - - | 307 |
| TRYBR_Cyt1    | A Y T F L K A Q G - | Y S I G - - K S   | - - K C E E S K L E | F A R S L L K K A E   | D R K V Q V L L P I | D H V C H T E F K A | - V D S P L I T E D | Q N - - - - | 307 |
| TRYBR_Cyt2    | A Y T F L K A Q G - | Y S I G - - K S   | - - K C E E S K L E | F A R S L L K K A E   | D R K V Q V L L P I | D H V C H T E F K A | - V D S P L I T E D | Q N - - - - | 307 |
| CRIFA_Cyt     | A Y T F O K A Q G - | H A I G - - S S   | - - M C E E D K L D | L A K S L L K K A Q   | E R N V E V L L P V | D H V C N K E F Q G | - V D A P L V T K D | V E - - - - | 304 |
| CRIFA_Gly     | A Y T F L R S Q G - | Y S I G - - T S   | - - H F E E A F V P | F A Q A L P A G S     | G R O V R V V L P E | D H V C H A H T R P | - A E A P L T T T S | A N - - - - | 392 |
| CORGL         | C Y T F L A A Q G - | H N V Q - - Q S   | - - L L Q E E M K E | T C D L L L A R F G   | D K - - - I V L P V | D L V A A S E F N K | D A E K Q I V D L D | S - - - - - | 293 |
| MYCLE         | C F T F L A A Q G - | F S V G - - K S   | - - L L E T E M I E | T C R S L L D T Y A   | D V - - - L R L P M | D I V V T E K F V A | D S P P Q T V A A D | A - - - - - | 297 |
| XANFL         | A N T F L A A L G - | K V G - - K S     | - - L C E H D L A N | T A R D L L K K A E   | A A G C E V L P V   | D A V V A T E F K A | N A A H R V T S V D | D - - - - - | 286 |

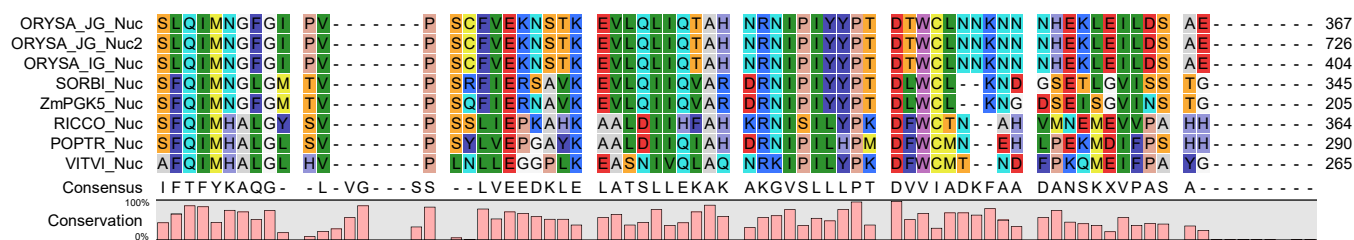







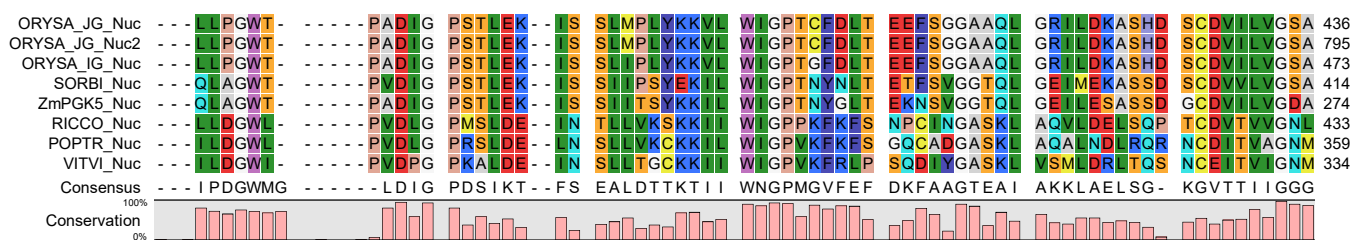

|               | 980 | 1,000        | 1,020      | 1,040      |    |     |
|---------------|-----|--------------|------------|------------|----|-----|
| POPNI_Cyt     |     | DSVAAVEKV    | GL-ADKMS   | HISTGGGA   | SL | 384 |
| POPTR_Cyt2    |     | DSVAAVEKV    | GL-ADKMS   | HISTGGGA   | SL | 384 |
| POPTR_Cyt1    |     | DSVAAVEKA    | GL-ADKMS   | HISTGGGA   | SL | 384 |
| RICCO_Cyt     |     | DSVAAVEKV    | GL-ADKMS   | HISTGGGA   | SL | 384 |
| GOSHI_Cyt     |     | DSVAAVEKA    | GL-ADKMS   | HISTGGGA   | SL | 384 |
| VITVI_Cyt     |     | DSVAAVEKV    | GL-AEKMS   | HISTGGGA   | SL | 384 |
| SOLTU_Cyt     |     | DSVAAVEKV    | GL-AEKMS   | HISTGGGA   | SL | 385 |
| NICTA_Cyt     |     | DSVAAVEKV    | GL-AEKMS   | HISTGGGA   | SL | 384 |
| HELAN_Cyt     |     | DSVAAVEKV    | GL-ADKMS   | HISTGGGA   | SL | 384 |
| ARATH_Cyt     |     | DSVAAVEKV    | GL-ADKMS   | HISTGGGA   | SL | 384 |
| PISSA_Cyt     |     | DSVAAVEKA    | GL-ADKMS   | HISTGGGA   | SL | 384 |
| SORBI_Cyt1    |     | DSVAAVEKA    | GL-ADKMS   | HISTGGGA   | SL | 385 |
| ZmPGK3_Cyt    |     | DSVAAVEKA    | GL-ADKMS   | HISTGGGA   | SL | 385 |
| ORYSA_IG_Cyt  |     | DSVAAVEKA    | GL-ADKMS   | HISTGGGA   | SL | 385 |
| ORYSA_JG_Cyt  |     | DSVAAVEKA    | GL-ADKMS   | HISTGGGA   | SL | 385 |
| SORBI_Cyt2    |     | DSVAAVEKA    | GL-ADKMS   | HISTGGGA   | SL | 384 |
| ORYSA_JG_Cyt2 |     | DSVAAVEKA    | GL-ADKMS   | HISTGGGA   | SL | 384 |
| TRIAE_Cyt     |     | DSVAAVEKA    | GL-ADKMS   | HISTGGGA   | SL | 384 |
| POPNI_Chl     |     | DSVAAVEKV    | GV-ADVMS   | HISTGGGA   | SL | 459 |
| POPTR_Chl2    |     | DSVAAVEKV    | GV-ADVMS   | HISTGGGA   | SL | 459 |
| POPTR_Chl1    |     | DSVAAVEKV    | GV-ADVMS   | HISTGGGA   | SL | 459 |
| RICCO_Chl     |     | DSVAAVEKV    | GV-AEVMS   | HISTGGGA   | SL | 457 |
| NICTA_Chl     |     | DSVAAVEKV    | GV-ASVMS   | HISTGGGA   | SL | 458 |
| NICBE_Chl     |     | DSVAAVEKV    | GV-ASVMS   | HISTGGGA   | SL | 458 |
| SOLTU_Chl     |     | DSVAAVEKV    | GV-ASVMS   | HISTGGGA   | SL | 459 |
| MUSAC_Chl     |     | DSVAAVEKV    | GV-ADVMS   | HISTGGGA   | SL | 457 |
| VITVI_Chl1    |     | DSVAAVEKV    | GV-ADVMS   | HISTGGGA   | SL | 370 |
| VITVI_Chl2    |     | DSVAAVEKV    | GV-ADVMS   | HISTGGGA   | SL | 456 |
| ARATH_Chl2    |     | DSVAAVEKV    | GV-AGVMS   | HISTGGGA   | SL | 459 |
| ARATH_Chl1    |     | DSVAAVEKV    | GV-AGVMS   | HISTGGGA   | SL | 456 |
| SORBI_Chl     |     | DSVAAVEKV    | GV-ADVMS   | HISTGGGA   | SL | 461 |
| ZmPGK1_Chl    |     | DSVAAVEKV    | GV-ADVMS   | HISTGGGA   | SL | 458 |
| ZmPGK2_Chl    |     | DSVAAVEKV    | GV-ADVMS   | HISTGGGA   | SL | 455 |
| TRIAE_Chl     |     | DSVAAVEKV    | GV-ADVMS   | HISTGGGA   | SL | 455 |
| SPIOL_Chl     |     | DSVAAVEKV    | GV-AEAMS   | HISTGGGA   | SL | 411 |
| MUSAC_Cyt     |     | DSVAAVEKV    | GL-AAKMS   | HISTGGGA   | SL | 384 |
| ORYSA_IG_Chl  |     | DSVAAVEKV    | GV-ANVMS   | HISTGGGA   | SL | 432 |
| ORYSA_JG_Chl2 |     | DSVAAVEKV    | GV-ANVMS   | HISTGGGA   | SL | 412 |
| ORYSA_JG_Chl3 |     | DSVAAVEKV    | GV-ANVMS   | HISTGGGA   | SL | 368 |
| PICSI_Chl     |     | DSVAAVEKA    | GL-AEKMS   | HISTGGGA   | SL | 450 |
| CHABR         |     | DSVAAVEKV    | GV-AEQIS   | HISTGGGA   | SL | 498 |
| CHLRE_Chl     |     | DSVAAVEQA    | GV-AEKMS   | HISTGGGA   | SL | 444 |
| VOLCA_Chl     |     | DSVAAVEQA    | GV-AEKMS   | HISTGGGA   | SL | 445 |
| ZmPGK4_Chl    |     | DSIAAVEKV    | GV-ADSLS   | HISTGGGA   | SL | 354 |
| MICSP_Chl     |     | DSVAAVEKA    | GL-ADKMS   | HISTGGGA   | SL | 420 |
| SYNSP         |     | DSVAAVEKA    | GL-AEKMS   | HISTGGGA   | SL | 384 |
| ORYSA_JG_Chl1 |     |              |            |            |    | 309 |
| BACME         |     | DSAAAVEKF    | NL-ADKMS   | HISTGGGA   | SL | 377 |
| BACST         |     | DSAAAVEKF    | GL-ADKMD   | HISTGGGA   | SL | 377 |
| THEMA         |     | DSAAAVNKF    | GL-EDKFS   | HVSTGGGA   | SL | 379 |
| THEAQ         |     | DSAAAVNRL    | GL-KERFG   | HVSTGGGA   | SL | 374 |
| ASPN1         |     | DTATVAAKY    | GA-EDKIS   | HVSTGGGA   | SL | 402 |
| PENCI         |     | DTATVAAKY    | KV-EDKIS   | HVSTGGGA   | SL | 400 |
| YARLI         |     | DTATVAAKY    | GA-EDKIS   | HVSTGGGA   | SL | 399 |
| TRIIE         |     | DTATVAAKY    | GV-EDKIS   | HVSTGGGA   | SL | 400 |
| TRIVI         |     | DTATVAAKY    | GV-EDKIS   | HVSTGGGA   | SL | 406 |
| NEUCR         |     | DTATVAAKY    | GV-EDKIS   | HVSTGGGA   | SL | 400 |
| CANMA         |     | DTATVAAKY    | GV-VDKIS   | HVSTGGGA   | SL | 399 |
| KLULA         |     | DTATVAAKY    | GV-VDKIS   | HVSTGGGA   | SL | 398 |
| SACCE         |     | DTATVAAKY    | GV-TDKIS   | HVSTGGGA   | SL | 398 |
| RHINI_PGK1    |     | DTATAALKW    | GA-EGQVS   | HISTGGGA   | SL | 399 |
| RHINI_PGK2    |     | DTATAALKW    | GA-EGKVS   | HISTGGGA   | SL | 399 |
| HOMSA_PGK1    |     | DTATCCAKW    | NT-EDKVS   | HVSTGGGA   | SL | 400 |
| MUSMU_PGK1    |     | DTATCCAKW    | NT-EDKVS   | HVSTGGGA   | SL | 400 |
| GALGA         |     | DTATCCAKW    | NT-EDKVS   | HVSTGGGA   | SL | 400 |
| HOMSA_PGK2    |     | DTATCCAKW    | NT-EDKVS   | HVSTGGGA   | SL | 400 |
| MUSMU_PGK2    |     | DTATCCAKW    | GT-EDKVS   | HVSTGGGA   | SL | 400 |
| SCHMA         |     | DTATCCAKW    | DT-EDKVS   | HVSTGGGA   | SL | 398 |
| DROME         |     | DTASCCAKW    | NT-EALVS   | HVSTGGGA   | SL | 398 |
| PLAFA         |     | DTASLVEQ     | NK-KNEIS   | HVSTGGGA   | SL | 399 |
| TETTH         |     | DTVNLVQE     | KA-TQKVS   | HVSTGGGA   | SL | 400 |
| TRYBR_Gly     |     | ESAGAAELC    | GE-AARIS   | HVSTGGGA   | SL | 491 |
| TRYCO_Gly     |     | DSASAAEQS    | GE-ATRMS   | HVSTGGGA   | SL | 491 |
| TRYCO_Cyt     |     | DSASAAEQS    | GE-ATRMS   | HVSTGGGA   | SL | 402 |
| TRYBR_Cyt1    |     | DSASAAELS    | GE-AKRMS   | HVSTGGGA   | SL | 402 |
| TRYBR_Cyt2    |     | DSASAAELS    | GE-AKRMS   | HVSTGGGA   | SL | 402 |
| CRIFA_Cyt     |     | DTASAAELS    | GE-AKNMS   | HVSTGGGA   | SL | 399 |
| CRIFA_Gly     |     | DTASAMMK     | GE-AAHIS   | HISTGGGA   | SL | 487 |
| CORGL         |     | DSAASVRL     | GLNEDGFS   | HISTGGGA   | SL | 389 |
| MYCLE         |     | DSAAAMRAL    | SLPEGSVS   | HLSTGGGA   | SL | 392 |
| XANFL         |     | DTVAAENHA    | GT-AERFS   | YVSTAGGA   | FL | 381 |
| ZYMMO         |     | DTVAAENHA    | GV-AKDFS   | FVSTAGGA   | FL | 381 |
| ESCCO         |     | DTLAAIDL     | GL-ADKIS   | YISTGGGA   | FL | 367 |
| HAELN         |     | DTLAAIDL     | GL-ADKIS   | YISTGGGA   | FL | 366 |
| CHLRE_Cyt     |     | DSVAAVTAA    | GL-DGAT    | HISTGGGA   | SL | 406 |
| VOLCA_Cyt     |     | DSVAAVTAA    | GL-STHT    | HISTGGGA   | SL | 417 |
| METBR         |     | HLAAAAQM     | GL-SSGIT   | HISSGGGA   | SL | 386 |
| METFE         |     | HLAAAAKM     | GL-SNKIN   | HISSGGGA   | CI | 385 |
| PICSI_Cyt     |     | DTLQAQFKSLHP | NLYQAALDNT | NYLYFTGGGT | VL | 432 |
| MICSP_Cyt     |     | DTLQAQFKSLSP | GLYMTALECP | SYLYFTGGGT | VL | 425 |
| HALVA         |     | DTSRALEM     | GMEDEFG    | HVSTAGGA   | YI | 385 |

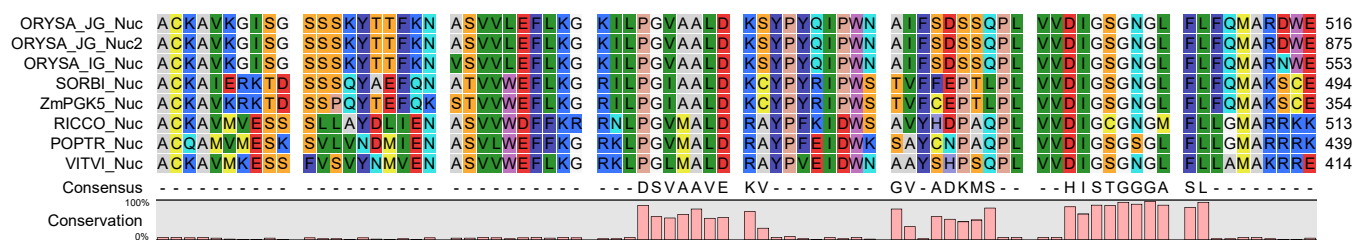

|               |          | 1,060 |  | 1,080 |  | 1,100 |     | 1,120  |            |            |     |
|---------------|----------|-------|--|-------|--|-------|-----|--------|------------|------------|-----|
| POPNI_Cyt     | -ELLE--G | KPL   |  |       |  | PGV   | LAL | DDA    |            | 401        |     |
| POPTR_Cyt2    | -ELLE--G | KPL   |  |       |  | PGV   | LAL | DDA    |            | 401        |     |
| POPTR_Cyt1    | -ELLE--G | KPL   |  |       |  | PGV   | LAL | DDA    |            | 401        |     |
| RICCO_Cyt     | -ELLE--G | KPL   |  |       |  | PGV   | LAL | DDA    |            | 401        |     |
| GOSHI_Cyt     | -ELLE--G | KQL   |  |       |  | PGV   | LAL | DDA    |            | 401        |     |
| VITVI_Cyt     | -ELLE--G | KTLL  |  |       |  | PGV   | LAL | DDA    |            | 401        |     |
| SOLTU_Cyt     | -ELLE--G | KPL   |  |       |  | PGV   | LAL | DDA    |            | 402        |     |
| NICTA_Cyt     | -ELLE--G | KPL   |  |       |  | PGV   | LAL | DDA    |            | 401        |     |
| HELAN_Cyt     | -ELLE--G | KPL   |  |       |  | PGV   | PAL | DEA    |            | 401        |     |
| ARATH_Cyt     | -ELLE--G | KPL   |  |       |  | PGV   | LAL | DEA    |            | 401        |     |
| PISSA_Cyt     | -ELLE--G | KPL   |  |       |  | PGV   | LAL | DDA    |            | 401        |     |
| SORBI_Cyt1    | -ELLE--G | KT    |  |       |  | PGV   | LAL | DDA    |            | 402        |     |
| ZmPGK3_Cyt    | -ELLE--G | KTLL  |  |       |  | PGV   | LAL | DDA    |            | 402        |     |
| ORYSA_IG_Cyt  | -ELLE--G | KTLL  |  |       |  | PGV   | LAL | DEA    |            | 402        |     |
| ORYSA_IG_Cyt  | -ELLE--G | KTLL  |  |       |  | PGV   | LAL | DEA    |            | 402        |     |
| SORBI_Cyt2    | -ELLE--G | KT    |  |       |  | PGV   | LAL | DEA    |            | 401        |     |
| ORYSA_IG_Cyt2 | -ELLE--G | KTLL  |  |       |  | PGV   | LAL | DDA    |            | 401        |     |
| TRIAE_Cyt     | -ELLE--G | KPL   |  |       |  | PGV   | LAL | DEA    |            | 401        |     |
| POPNI_Chl     | -ELLE--G | KEL   |  |       |  | PGV   | LAL | DEVE   | RVA        | 480        |     |
| POPTR_Chl2    | -ELLE--G | KEL   |  |       |  | PGV   | LAL | DEVE   | RVA        | 480        |     |
| POPTR_Chl1    | -ELLE--G | KEL   |  |       |  | PGV   | LAL | DEVE   | RVA        | 480        |     |
| RICCO_Chl     | -ELLE--G | KEL   |  |       |  | PGV   | LAL | DEAT   | PVA        | 478        |     |
| NICTA_Chl     | -ELLE--G | KVL   |  |       |  | PGV   | LAL | DEAD   | A-PVA      | 480        |     |
| NICBE_Chl     | -ELLE--G | KVL   |  |       |  | PGV   | VAL | DEAD   | A-PVA      | 480        |     |
| SOLTU_Chl     | -ELLE--G | KVL   |  |       |  | PGV   | LAL | DEAD   | A-PVA      | 481        |     |
| MUSAC_Chl     | -ELLE--G | KEL   |  |       |  | PGV   | VAL | DEAV   | V-VA       | 478        |     |
| VITVI_Chl1    | -ELLE--G | KEL   |  |       |  | PGV   | VAL | DEAT   | PVP        | 391        |     |
| VITVI_Chl2    | -ELLE--G | KEL   |  |       |  | PGV   | VAL | DEAT   | PVP        | 477        |     |
| ARATH_Chl2    | -ELLE--G | KVL   |  |       |  | PGV   | LAL | DEA    | I-PVT      | 480        |     |
| ARATH_Chl1    | -ELLE--G | KVL   |  |       |  | PGV   | LAL | DEA    | I-PVT      | 477        |     |
| SORBI_Chl     | -ELLE--G | KEL   |  |       |  | PGV   | VAL | DEAL   | PVA        | 482        |     |
| ZmPGK1_Chl    | -ELLE--G | KEL   |  |       |  | PGV   | VAL | NEAA   | TVT        | 479        |     |
| ZmPGK2_Chl    | -ELLE--G | KEL   |  |       |  | PGV   | TAL | DEAA   | TVT        | 476        |     |
| TRIAE_Chl     | -ELLE--G | KEL   |  |       |  | PGV   | VAL | DEGV   | MTRSVT     | 479        |     |
| SPIOL_Chl     | -ELLE--G | KQL   |  |       |  | PGV   | LAL | NEAD   | PVP        | 432        |     |
| MUSAC_Cyt     | -ELLE--G | KT    |  |       |  | PGV   | LAL | EDA    |            | 401        |     |
| ORYSA_IG_Chl  | -ELLE--G | KEL   |  |       |  | PGV   | VAL | DEA    |            | 449        |     |
| ORYSA_IG_Chl2 | -ELLE--G | KEL   |  |       |  | PGV   | VAL | DEA    |            | 429        |     |
| ORYSA_IG_Chl3 | -ELLE--G | KEL   |  |       |  | PGV   | VAL | DEA    |            | 385        |     |
| PICSI_Chl     | -ELLE--G | KT    |  |       |  | PGV   | LAL | DDA    | VPVT       | 471        |     |
| CHABR         | -ELLE--G | KVL   |  |       |  | PGV   | AAL | DEAP   | ALVS       | 520        |     |
| CHLRE_Chl     | -ELLE--G | KVL   |  |       |  | PGV   | AAL | DEK    |            | 461        |     |
| VOLCA_Chl     | -ELLE--G | KVL   |  |       |  | PGV   | AAL | DEK    |            | 462        |     |
| ZmPGK4_Chl    | -ELLE--G | KEL   |  |       |  | PGV   | AAL | DEA    |            | 371        |     |
| MICSP_Chl     | -ELLE--G | KVL   |  |       |  | PGV   | DAL | DEA    |            | 437        |     |
| SYNSP         | -ELLE--G | KVL   |  |       |  | PGV   | AAL | DDA    |            | 401        |     |
| ORYSA_IG_Chl1 | -ELLE--G | KEL   |  |       |  | PGV   | VAL | NDK    |            | 394        |     |
| BACME         | EFME--G  | KEL   |  |       |  | PGV   | VAL | EDK    |            | 394        |     |
| BACST         | EFME--G  | KQL   |  |       |  | PGI   | ASM | RTKK   | A          | 398        |     |
| THEMA         | EFLE--G  | KEL   |  |       |  | PGI   | EVL | EG     |            | 390        |     |
| THEAQ         | EFLE--K  | GTLL  |  |       |  | PGV   | AAL | SEKS   | K          | 421        |     |
| ASPNI         | -ELLE--G | KEL   |  |       |  | PGV   | AAL | S--S   | K          | 417        |     |
| PENCI         | -ELLE--G | KEL   |  |       |  | PGV   | AAL | SEK    | K          | 417        |     |
| YARLI         | -ELLE--G | KTLL  |  |       |  | PGV   | VAL | SSK    |            | 417        |     |
| TRIIE         | -ELLE--G | KEL   |  |       |  | PGV   | TAL | SSK    |            | 423        |     |
| TRIVI         | -ELLE--G | KEL   |  |       |  | PGV   | VAL | SER    | Q          | 418        |     |
| NEUCR         | -ELLE--G | KAL   |  |       |  | PGV   | TAL | SNKA   |            | 417        |     |
| CANMA         | -ELLE--G | KEL   |  |       |  | PGV   | TFL | SNK    | Q          | 416        |     |
| KLULA         | -ELLE--G | KEL   |  |       |  | PGV   | AFL | SEK    | K          | 416        |     |
| SACCE         | -ELLE--G | KEL   |  |       |  | PGV   | TAL | SSKN   |            | 417        |     |
| RHINI_PGK1    | -ELLE--G | KEL   |  |       |  | PGV   | TAL | SSKN   |            | 417        |     |
| RHINI_PGK2    | -ELLE--G | KEL   |  |       |  | PGV   | DAL | SNJ    |            | 417        |     |
| HOMSA_PGK1    | -ELLE--G | KVL   |  |       |  | PGV   | DAL | SNV    |            | 417        |     |
| MUSMU_PGK1    | -ELLE--G | KVL   |  |       |  | PGV   | DAL | SSV    |            | 417        |     |
| GALGA         | -ELLE--G | KVL   |  |       |  | PGV   | EAL | SNM    |            | 417        |     |
| HOMSA_PGK2    | -ELLE--G | KTLL  |  |       |  | PGV   | EAL | SNM    |            | 417        |     |
| MUSMU_PGK2    | -ELLE--G | KILL  |  |       |  | PGV   | VAL | TDAH   |            | 416        |     |
| SCHMA         | -ELLE--G | KQL   |  |       |  | PGV   | AAL | TSA    |            | 415        |     |
| DROME         | -ELLE--G | KTLL  |  |       |  | PGV   | LAL | SNK    | QL         | 416        |     |
| PLAFA         | -ELLE--G | KEL   |  |       |  | PGV   | AYL | TDJ    | QL         | 420        |     |
| TETTH         | -ELLE--G | KVL   |  |       |  | PGV   | AVL | DDKE   |            | 509        |     |
| TRYBR_Gly     | -ELLE--G | KTLL  |  |       |  | PGV   | AIL | DEKV   |            | 420        |     |
| TRYCO_Gly     | -ELLE--G | KTLL  |  |       |  | PGV   | TVL | DEKE   |            | 420        |     |
| TRYCO_Cyt     | -ELLE--G | KTLL  |  |       |  | PGV   | AVL | DEKS   | AVYSWASAGT | G-         | 431 |
| TRYBR_Cyt1    | -ELLE--G | KTLL  |  |       |  | PGV   | TVL | TNKS   | AKAPAAAAA  | GGDCPCGSGC | 437 |
| TRYBR_Cyt2    | -ELLE--G | KTLL  |  |       |  | PGV   | AVL | DNKE   |            | 505        |     |
| CRIFA_Cyt     | -ELLE--G | KSL   |  |       |  | PGV   | AIL | AQ     |            | 405        |     |
| CRIFA_Gly     | -ELLE--G | KVL   |  |       |  | PGI   | EVL | GREQ   |            | 410        |     |
| CORGL         | EYLE--G  | KEL   |  |       |  | PGV   | EAL | RR     |            | 397        |     |
| MYCLE         | EYLE--G  | KTLL  |  |       |  | PGV   | KAL | EA     |            | 397        |     |
| XANFL         | EWLE--G  | KAL   |  |       |  | PAV   | AML | EERA   | KK         | 387        |     |
| ZYMMO         | EWME--G  | KEL   |  |       |  | PAV   | EJL | EKRA   | KN         | 386        |     |
| ESCCO         | EFVE--G  | KVL   |  |       |  | PGI   | RAL | RGRTVS | ASAPAPAPAP | APATPVVPVP | 447 |
| HAEIN         | EFVE--G  | KVL   |  |       |  | PGI   | RTL | RTESQ  | EQ         | 440        |     |
| CHLRE_Cyt     | -ELLE--G | KGM   |  |       |  | PLV   | EIL | TEVKMK |            | 406        |     |
| VOLCA_Cyt     | -ELLE--G | KGM   |  |       |  | PAI   | KVL | EEARKR |            | 405        |     |
| METBR         | NLLA--G  | EKL   |  |       |  | DTV   | RAL | -EN    |            | 456        |     |
| METFE         | AFLS--G  | EEL   |  |       |  | PCV   | ELL | TADGE  |            | 453        |     |
| PICSI_Cyt     | EVIIEGDS | MGL   |  |       |  | GVV   | EVL | OR     |            | 401        |     |
| MICSP_Cyt     | KALEGGA  | TKL   |  |       |  |       |     |        |            |            |     |
| HALVA         | RAITRA   | QL    |  |       |  |       |     |        |            |            |     |

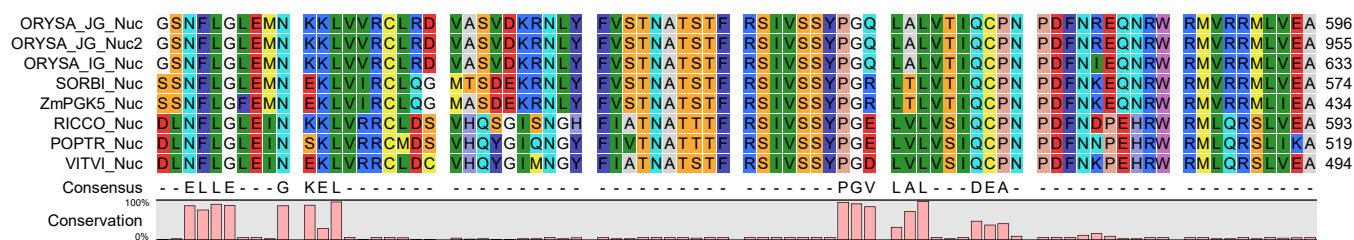

|               |             | 1,140    | 1,160    | 1,180 | 1,200 |     |
|---------------|-------------|----------|----------|-------|-------|-----|
| POPNI_Cyt     | -           | -        | -        | -     | -     | 401 |
| POPTR_Cyt2    | -           | -        | -        | -     | -     | 401 |
| POPTR_Cyt1    | -           | -        | -        | -     | -     | 401 |
| RICCO_Cyt     | -           | -        | -        | -     | -     | 401 |
| GOSHI_Cyt     | -           | -        | -        | -     | -     | 401 |
| VITVI_Cyt     | -           | -        | -        | -     | -     | 401 |
| SOLTU_Cyt     | -           | -        | -        | -     | -     | 402 |
| NICTA_Cyt     | -           | -        | -        | -     | -     | 401 |
| HELAN_Cyt     | -           | -        | -        | -     | -     | 401 |
| ARATH_Cyt     | -           | -        | -        | -     | -     | 401 |
| PISSA_Cyt     | -           | -        | -        | -     | -     | 401 |
| SORBI_Cyt1    | -           | -        | -        | -     | -     | 402 |
| ZmPGK3_Cyt    | -           | -        | -        | -     | -     | 402 |
| ORYSA_IG_Cyt  | -           | -        | -        | -     | -     | 402 |
| ORYSA_JG_Cyt  | -           | -        | -        | -     | -     | 402 |
| SORBI_Cyt2    | -           | -        | -        | -     | -     | 401 |
| ORYSA_JG_Cyt2 | -           | -        | -        | -     | -     | 401 |
| TRIAE_Cyt     | -           | -        | -        | -     | -     | 401 |
| POPNI_Chl     | -           | V        | -        | -     | -     | 481 |
| POPTR_Chl2    | -           | V        | -        | -     | -     | 481 |
| POPTR_Chl1    | -           | V        | -        | -     | -     | 481 |
| RICCO_Chl     | -           | V        | -        | -     | -     | 479 |
| NICTA_Chl     | -           | V        | -        | -     | -     | 481 |
| NICBE_Chl     | -           | V        | -        | -     | -     | 481 |
| SOLTU_Chl     | -           | V        | -        | -     | -     | 482 |
| MUSAC_Chl     | -           | V        | -        | -     | -     | 479 |
| VITVI_Chl1    | -           | V        | -        | -     | -     | 392 |
| VITVI_Chl2    | -           | V        | -        | -     | -     | 478 |
| ARATH_Chl2    | -           | -        | -        | -     | -     | 480 |
| ARATH_Chl1    | -           | V        | -        | -     | -     | 478 |
| SORBI_Chl     | -           | V        | -        | -     | -     | 483 |
| ZmPGK1_Chl    | -           | V        | -        | -     | -     | 480 |
| ZmPGK2_Chl    | -           | V        | -        | -     | -     | 477 |
| TRIAE_Chl     | -           | V        | -        | -     | -     | 480 |
| SPIOL_Chl     | -           | V        | -        | -     | -     | 433 |
| MUSAC_Cyt     | -           | -        | -        | -     | -     | 401 |
| ORYSA_IG_Chl  | -           | -        | -        | -     | -     | 449 |
| ORYSA_JG_Chl2 | -           | -        | -        | -     | -     | 429 |
| ORYSA_JG_Chl3 | -           | -        | -        | -     | -     | 385 |
| PICSI_Chl     | -           | V        | -        | -     | -     | 472 |
| CHABR         | -           | -        | -        | -     | -     | 520 |
| CHLRE_Chl     | -           | -        | -        | -     | -     | 461 |
| VOLCA_Chl     | -           | -        | -        | -     | -     | 462 |
| ZmPGK4_Chl    | -           | -        | -        | -     | -     | 371 |
| MICSP_Chl     | -           | -        | -        | -     | -     | 437 |
| SYNSP         | -           | A        | -        | -     | -     | 402 |
| ORYSA_JG_Chl1 | -           | V        | -        | -     | -     | 310 |
| BACME         | -           | -        | -        | -     | -     | 394 |
| BACST         | -           | -        | -        | -     | -     | 394 |
| THEMA         | -           | -        | -        | -     | -     | 398 |
| THEAQ         | -           | -        | -        | -     | -     | 390 |
| ASPNI         | -           | -        | -        | -     | -     | 421 |
| PENCI         | -           | -        | -        | -     | -     | 417 |
| YARLI         | -           | -        | -        | -     | -     | 417 |
| TRIIRE        | -           | -        | -        | -     | -     | 417 |
| TRIVI         | -           | -        | -        | -     | -     | 423 |
| NEUCR         | -           | -        | -        | -     | -     | 418 |
| CANMA         | -           | -        | -        | -     | -     | 417 |
| KLULA         | -           | -        | -        | -     | -     | 416 |
| SACCE         | -           | -        | -        | -     | -     | 416 |
| RHINI_PGK1    | -           | -        | -        | -     | -     | 417 |
| RHINI_PGK2    | -           | -        | -        | -     | -     | 417 |
| HOMSA_PGK1    | -           | -        | -        | -     | -     | 417 |
| MUSMU_PGK1    | -           | -        | -        | -     | -     | 417 |
| GALGA         | -           | -        | -        | -     | -     | 417 |
| HOMSA_PGK2    | -           | -        | -        | -     | -     | 417 |
| MUSMU_PGK2    | -           | -        | -        | -     | -     | 417 |
| SCHMA         | -           | -        | -        | -     | -     | 416 |
| DROME         | -           | -        | -        | -     | -     | 415 |
| PLAFA         | -           | -        | -        | -     | -     | 416 |
| TETTH         | -           | -        | -        | -     | -     | 420 |
| TRYBR_Gly     | -           | -        | -        | -     | -     | 509 |
| TRYCO_Gly     | -           | -        | -        | -     | -     | 509 |
| TRYCO_Cyt     | -           | -        | -        | -     | -     | 420 |
| TRYBR_Cyt1    | -           | -        | -        | -     | -     | 420 |
| TRYBR_Cyt2    | -           | T        | LSNRWSSL | -     | -     | 440 |
| CRIFA_Cyt     | AAVPAATAT   | SMV      | ASP      | -     | -     | 455 |
| CRIFA_Gly     | -           | -        | -        | -     | -     | 505 |
| CORGL         | -           | -        | -        | -     | -     | 405 |
| MYCLE         | -           | PRGGDS   | -        | -     | -     | 416 |
| XANFL         | -           | -        | -        | -     | -     | 397 |
| ZYMMO         | -           | -        | -        | -     | -     | 397 |
| ESCCO         | -           | -        | -        | -     | -     | 387 |
| HAEIN         | -           | -        | -        | -     | -     | 386 |
| CHLRE_Cyt     | QQTAAAAAPAC | CAAKKCCT | -        | -     | -     | 465 |
| VOLCA_Cyt     | -           | -        | -        | -     | -     | 440 |
| METBR         | -           | GRK      | -        | -     | -     | 409 |
| METFE         | -           | SDKY     | -        | -     | -     | 410 |
| PICSI_Cyt     | QSEN        | -        | PK       | -     | -     | 462 |
| MICSP_Cyt     | EKKCMALLES  | CDGPTPA  | -        | -     | -     | 471 |
| HALVA         | -           | -        | -        | -     | -     | 401 |

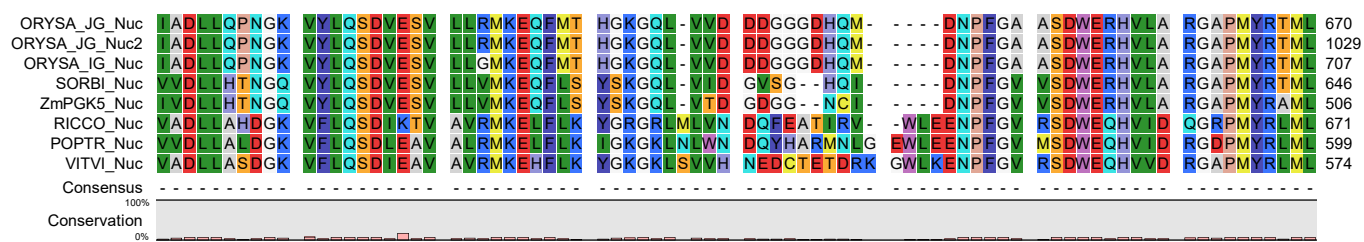

|               |     |
|---------------|-----|
| POPNI_Cyt     | 401 |
| POPTR_Cyt2    | 401 |
| POPTR_Cyt1    | 401 |
| RICCO_Cyt     | 401 |
| GOSHI_Cyt     | 401 |
| VITVI_Cyt     | 401 |
| SOLTU_Cyt     | 402 |
| NICTA_Cyt     | 401 |
| HELAN_Cyt     | 401 |
| ARATH_Cyt     | 401 |
| PISSA_Cyt     | 401 |
| SORBI_Cyt1    | 402 |
| ZmPGK3_Cyt    | 402 |
| ORYSA_IG_Cyt  | 402 |
| ORYSA_JG_Cyt  | 402 |
| SORBI_Cyt2    | 401 |
| ORYSA_JG_Cyt2 | 401 |
| TRIAE_Cyt     | 401 |
| POPNI_Ch1     | 481 |
| POPTR_Ch12    | 481 |
| POPTR_Ch1     | 481 |
| RICCO_Ch1     | 479 |
| NICTA_Ch1     | 481 |
| NICBE_Ch1     | 481 |
| SOLTU_Ch1     | 482 |
| MUSAC_Ch1     | 479 |
| VITVI_Ch11    | 392 |
| VITVI_Ch12    | 478 |
| ARATH_Ch12    | 480 |
| ARATH_Ch11    | 478 |
| SORBI_Ch1     | 483 |
| ZmPGK1_Ch1    | 480 |
| ZmPGK2_Ch1    | 477 |
| TRIAE_Ch1     | 480 |
| SPIOL_Ch1     | 433 |
| MUSAC_Cyt     | 401 |
| ORYSA_IG_Ch1  | 449 |
| ORYSA_JG_Ch12 | 429 |
| ORYSA_JG_Ch13 | 385 |
| PICSI_Ch1     | 472 |
| CHABR         | 520 |
| CHLRE_Ch1     | 461 |
| VOLCA_Ch1     | 462 |
| ZmPGK4_Ch1    | 371 |
| MICSP_Ch1     | 437 |
| SYNSP         | 402 |
| ORYSA_JG_Ch11 | 310 |
| BACME         | 394 |
| BACST         | 394 |
| THEMA         | 398 |
| THEAQ         | 390 |
| ASPNI         | 421 |
| PENCI         | 417 |
| YARLI         | 417 |
| TRIIRE        | 417 |
| TRIVI         | 423 |
| NEUCR         | 418 |
| CANMA         | 417 |
| KLULA         | 416 |
| SACCE         | 416 |
| RHINI_PGK1    | 417 |
| RHINI_PGK2    | 417 |
| HOMSA_PGK1    | 417 |
| MUSMU_PGK1    | 417 |
| GALGA         | 417 |
| HOMSA_PGK2    | 417 |
| MUSMU_PGK2    | 417 |
| SCHMA         | 416 |
| DROME         | 415 |
| PLAFA         | 416 |
| TETTH         | 420 |
| TRYBR_Gly     | 509 |
| TRYCO_Gly     | 509 |
| TRYCO_Cyt     | 420 |
| TRYBR_Cyt1    | 420 |
| TRYBR_Cyt2    | 440 |
| CRIFA_Cyt     | 455 |
| CRIFA_Gly     | 505 |
| CORGL         | 405 |
| MYCLE         | 416 |
| XANFL         | 397 |
| ZYMMO         | 397 |
| ESCCO         | 387 |
| HAEIN         | 386 |
| CHLRE_Cyt     | 465 |
| VOLCA_Cyt     | 440 |
| METBR         | 409 |
| METFE         | 410 |
| PICSI_Cyt     | 462 |
| MICSP_Cyt     | 471 |
| HALVA         | 401 |



|               |                                                                                   |         |      |
|---------------|-----------------------------------------------------------------------------------|---------|------|
| ORYSA_JG_Nuc  | RKVV                                                                              | - - - - | 673  |
| ORYSA_JG_Nuc2 | RKVV                                                                              | - - - - | 1032 |
| ORYSA_IG_Nuc  | RKVV                                                                              | - - - - | 710  |
| SORBI_Nuc     | KKVV                                                                              | - - - - | 649  |
| ZmPGK5_Nuc    | KKMV                                                                              | - - - - | 509  |
| RICCO_Nuc     | SKSTNGE                                                                           |         | 678  |
| POPTR_Nuc     | SKSSGLE                                                                           |         | 606  |
| VITVI_Nuc     | SKSTRPN                                                                           |         | 581  |
| Consensus     | - - - - -                                                                         |         |      |
| Conservation  |  |         |      |
