# Supplementary figures and images for: The Phosphoglycerate Kinase (PGK) Gene Family of Maize (Zea mays var. B73)
Source: MDPI journal article supplement (doi:10.3390/plants9121639), 2020-11-24

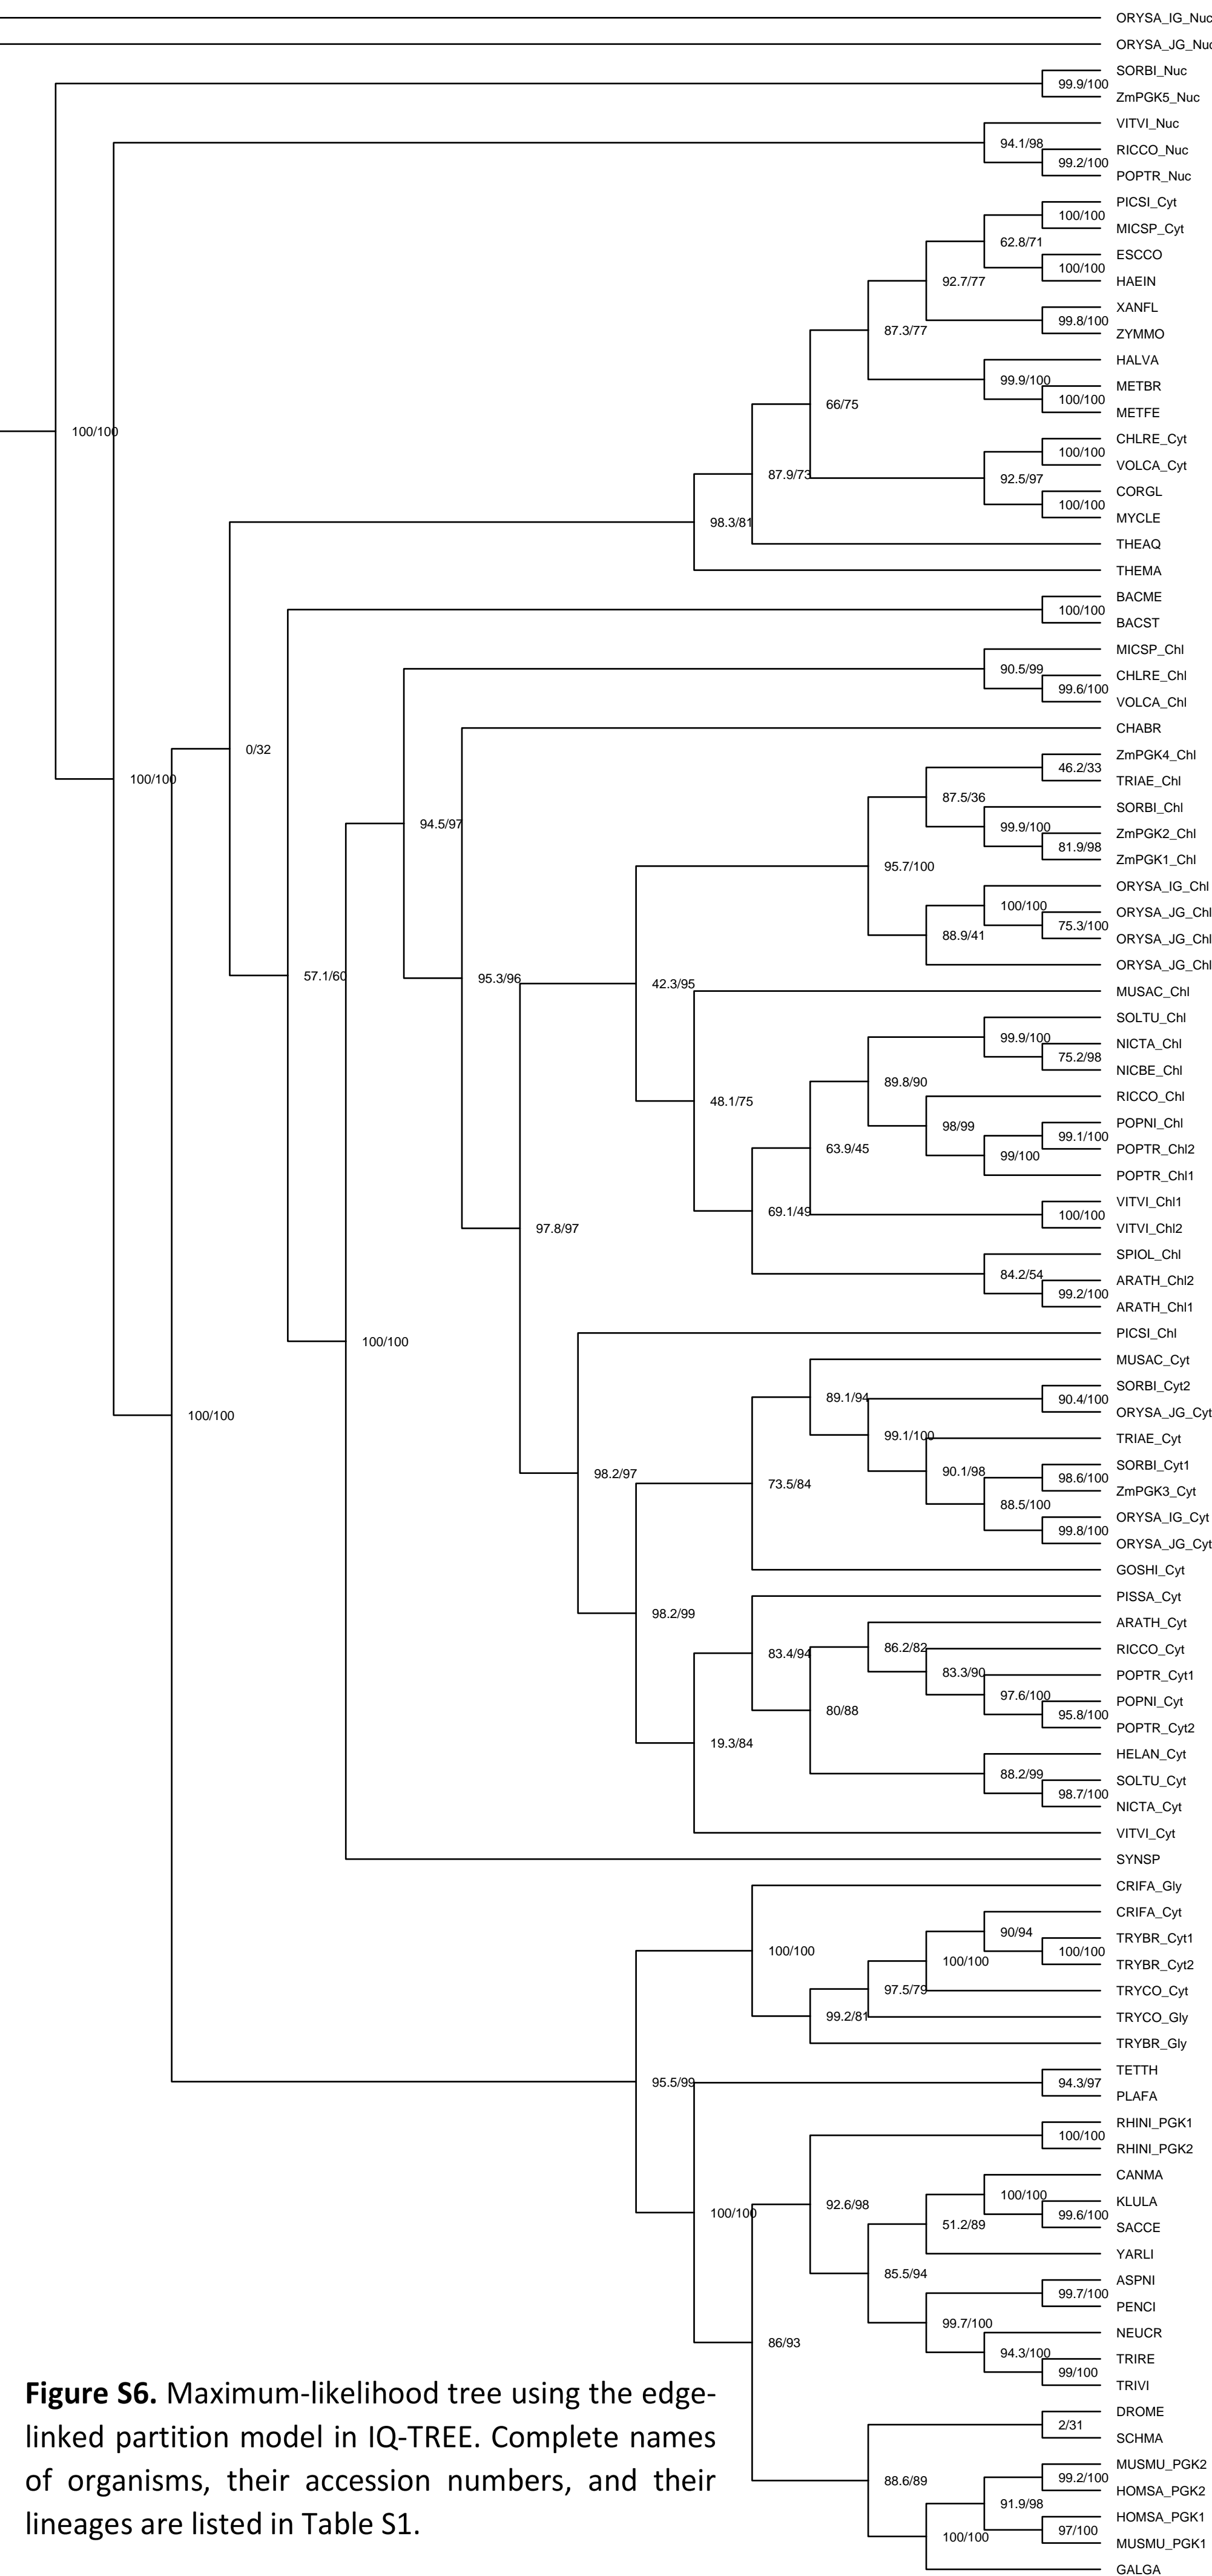

Supplement: s1 [file s1]
